# Supplementary material for: Augmented cartilage regeneration by implantation of cellular versus acellular implants after bone marrow stimulation: a systematic review and meta-analysis of animal studies
Source: PeerJ journal article supplement (doi:10.7717/peerj.3927), 2017-10-27
Supplement: Rationale_and_contribution_systematic_review_and_meta-analysis.pdf [file Rationale_and_contribution_systematic_review_and_meta-analysis.pdf]

1 **Augmented cartilage regeneration by implantation of cellular versus acellular**  
2 **implants after bone marrow stimulation: a systematic review and meta-**  
3 **analysis of animal studies**  
4 **by Pot *et al.***

5 **Rationale for conducting the meta-analysis**

6 For patients, localized cartilage defects can have detrimental long term effects such as joint  
7 dysfunction, pain, and degenerative osteoarthritis. Upon cartilage damage, the avascular nature of  
8 cartilage prevents spontaneous healing [1]. Clinical treatments, including bone marrow stimulation  
9 techniques (microfracturing/subchondral drilling), result in temporary clinical improvement.  
10 Therefore, the demand for improved cartilage regeneration persists [2].

11 Cartilage regeneration may be improved by tissue engineering and regenerative medicine  
12 (TERM) in addition to bone marrow stimulating techniques. For clinical application of new regenerative  
13 medicine and tissue engineering strategies, the effectiveness of implants, biologics and cells needs to  
14 be proven. The aim of this systematic review and meta-analysis is to assess all current evidence for the  
15 efficacy of articular cartilage regeneration using cellular implants versus acellular implants.

16 **Contribution of this meta-analysis in the light of published related reports**

17 In a previous systematic review and meta-analysis on animal models, we investigated acellular  
18 implants (vs. bone marrow stimulation), specifically focusing on material properties of implants and  
19 the addition of biologics [3]. Implantation of acellular biomaterials in addition to bone marrow  
20 stimulation was more effective in the regeneration of cartilage *in vivo* than bone marrow stimulation  
21 alone, which was further improved by use of biologics.

22 When biomaterials are loaded with cells, bone marrow stimulation may be even more  
23 effective. The aim of this systematic review and meta-analysis is to assess all current evidence for the  
24 efficacy of articular cartilage regeneration using cellular and acellular implants and more specifically  
25 loading of implants with (1) stem cells versus somatic (differentiated) cells, (2) different cell types (*e.g.*  
26 chondrocytes, MSCs and ADSCs), and (3) culture conditions of cells (*e.g.* direct use after harvesting, *in*  
27 *vitro* expansion and/or differentiation). No other systematic review and meta-analysis has been  
28 performed to assess the effect of the loading of cells to implants on cartilage regeneration in animal  
29 models.

30

31 **References**

32 [1] Buckwalter JA, Saltzman C, Brown T. The impact of osteoarthritis: implications for research.

- 33 Clin Orthop Relat Res 2004; 427 Suppl: S6-15
- 34 [2] Saris D, Price A, Widuchowski W, Bertrand-Marchand M, Caron J, Drogset JO, et al. Matrix-  
35 applied characterized autologous cultured chondrocytes versus microfracture: two-year  
36 follow-up of a prospective randomized trial. Am J Sports Med 2014; 42: 1384-1394.
- 37 [3] Pot MW, Gonzales VK, Buma P, IntHout J, van Kuppevelt TH, de Vries RBM, et al. Improved  
38 cartilage regeneration by implantation of acellular biomaterials after bone marrow  
39 stimulation: a systematic review and meta-analysis of animal studies. PeerJ 2016; 4: e2243-  
40 2269.
