# Supplementary material for: Augmented cartilage regeneration by implantation of cellular versus acellular implants after bone marrow stimulation: a systematic review and meta-analysis of animal studies
Source: PeerJ. 2017 Oct 27;5:e3927. doi: 10.7717/peerj.3927 (PMC5661456; doi:10.7717/peerj.3927)
Supplement: Supplemental Information 5 [file peerj-05-3927-s005.xlsx]

## Sheet: Systematic Review
Supplementary Information 3. Study characteristics of included studies.
Remarks can be found below this table.
Reference		Animals						Surgery		Experimental						Meta-analysis
Author	Year of publication	Species	Strain	Number of animals	Sex (Male/Female)	Age	Weight	Location	Defect (Size / Depth)	Groups	Cells	Follow-up	Biomaterial	Biologicals	Outcome measures	Included based on full-text screening and semi-quantitative histological scoring	Excluded after full-text phase	Remarks
Ahn1	2009	Rabbits	New Zealand White	28	-	12 - 18 months	4.23 ± 0.33 kg	Trochlea	Size: 6 mm / Depth: 5 mm	1) Biphasic scaffold, 2) Biphasic scaffold + chondrocytes, 3) Osteochondral fragment, 4) Empty defect	Chondrocytes	3 months	β-TCP-hydroxyapatite/Hyaluronate-atelocollagen		Macroscopic evaluation, Semi-quantitative macroscopic evaluation, Histology, Immunohistochemistry, Semi-quantitative histological scoring	√
Albrecht2	1983	Rabbits	-	46	M/F	> 2 years	> 3.5 kg	Trochlea	Size: 4 mm / Depth: Osteochondral defect	1) Collagen scaffold, 2) Fibrin, 3) Fibrin-minced cartilage, 4) Collagen scaffold + fibrin, 5) Empty defect	Cartilage	2, 4, 6, 8, 10, 12, 18, 22, 24, 32 and 40 weeks	Fibrin, collagen scaffold		Macroscopic evaluation, Histology	X
Arakaki3	2015	Macaques	Cynomolgus	18	-	5 - 7 years	7 - 9 kg	Trochlea	Size: 3 mm / Depth: 3 mm	1) Collagen type I hydrogel, 2) Collagen type I hydrogel + MSCs, 3) Empty defect	MSCs	6, 12 and 24 weeks	Collagen type I hydrogel		Macroscopic evaluation, Histology, Immunohistochemistry, Semi-quantitative histological scoring, Histomorphometry	√
Bai4	2008	Rabbits	New Zealand	24	M/F	Adult	2 - 3 kg	Trochlea	Size: 3 mm / Depth: 3 mm	1) Bone matrix gelatin, 2) Bone matrix gelatin + MSCs, 3) Empty defect	MSCs	8 and 12 weeks	Bone matrix gelatin		Macroscopic evaluation, Histology, Immunohistochemistry, Semi-quantitative histological scoring	√		Excluded from methodological quality assessmen: article in Chinese. Assumption for meta-analysis: maximum score = 14.
Bal5	2010	Rabbits	New Zealand White	20	-	Adult	< 2 kg	Medial condyle and trochlea	Size: 3.2 mm / Depth: 4 mm	1) Allograft bone/PEG hydrogel, 2) Bioglass/PEG hydrogel, 3) Tantalum/PEG hydrogel, 4) Allograft bone/PEG hydrogel + MSCs, 5) Bioglass/PEG hydrogel + MSCs, 6) Tantalum/PEG hydrogel + MSCs, 7) Empty defect	MSCs	6 and 12 weeks	Allograft bone/PEG hydrogel, Bioglass/PEG hydrogel, Tantalum/PEG hydrogel		Macroscopic evaluation, Histology, Immunohistochemistry, Semi-quantitative histological scoring	√
Barron6	2015	Rabbits	New Zealand	9	M	Adult	> 3 kg	Medial condyle	Size: 3 mm / Depth: 2.8 mm	1) PEOT/PBT, 2) PEOT/PBT + MSCs, 3) Empty defect	MSCs	12 weeks	PEOT/PBT	Fibronectin	Histology, Immunohistochemistry, Semi-quantitative histological scoring	√
Barron7	2016	Rabbits	New Zealand White	9	M M	Adult	> 3 kg	Medial condyle	Size: 2.8 mm / Depth: 1 mm	1) PLCL, 2) PLCL + MSCs, 3) Empty defect	MSCs	4 weeks	PLCL		Macroscopic evaluation, Histology, Immunohistochemistry	X
Betsch8	2013	Minipigs	Göttingen	14	F	18 - 30 months	25 - 35 kg	Medial condyle	Size: 6 mm / Depth: 10 mm	1) TRUFIT, 2) TRUFIT + PRP, 3) TRUFIT + BMAC, 4) Trufit + PRP + BMAC	BMAC	26 weeks	TRUFIT BGS©(superscript) (50% PLGA, 10% PGA, 40% calcium sulphate)	PRP	Macroscopic evaluation, Histology, Immunohistochemistry, Semi-quantitative histological scoring	√
Betsch9	2014	Minipigs	Goettinger	14	F	18 - 30 months	25 - 35 kg	Medial condyle	Size: 6 mm / Depth: 10 mm	1) TRUFIT BGS, 2) TRUFIT BGS + BMAC, 3) TRUFIT BGS + EPO, 4) TRUFIT BGS + BMAC + EPO	BMAC + EPO	26 weeks	TRUFIT BGS (polylactide-co-glycolide, calcium sulfate and polyglycolide fibers)	EPO	Macroscopic evaluation, Histology, Immunohistochemistry, Semi-quantitative histological scoring, µCT	√
Caminal10	2015	Sheeps	Ripollesa-Lacona	8	-	3 years	-	Medial and lateral condyle	Size: 3.5 mm / Depth: 5 mm	1) PLGA, 2) PLGA + ASCs, 3) PLGA + MSCs, 4) PLGA + chondrocytes, 5) Empty defect	ASCs, chondrocytes, MSCs	6 and 12 months	PLGA		Macroscopic evaluation, Histology, Immunohistochemistry, Semi-quantitative histological scoring, MRI	√
Cao11	2012	Rabbits	New Zealand White	18	-	-	-	Trochlea	Size: 4 mm / Depth: - mm (Full-thickness defect and implant height: 5 mm)	1) Scaffold, 2) Scaffold + ASCs, 3) Empty defect	ASCs	8 and 12 weeks	Collagen-modified bovine cancellous bone-collagen hydrogel-bBMPs/Collagen membrane/Collagen-chitosan-collagen hydrogel-bBMPs	Crude extracted bovine BMPs	Macroscopic evaluation, Histology, Semi-quantitative histological scoring	√
Chang12	2011	Minipigs	Lee-Sung	16	M/F	- TGF-β1: 5.8 - 6 months, + TGF-β1: 5 - 6.3 months	- TGF-β1: 20.8 - 23.5 kg (avg: 21.6), + TGF-β1: 21.9 - 28.2 kg (avg: 22.9)	Medial condyle	Size: 6.5 mm / Depth: 3 mm	1) Collagen type I hydrogel, 2) Collagen type I hydrogel + MSCs, 3) Collagen type I hydrogel + MSCs + TGF-β, 4) Empty defect	MSCs	6 months	Type I collagen hydrogel (PorcogenTM)	TGF-β1	Histology, Semi-quantitative histological scoring, Biomechanical tests	√
Chang13	2013	Rabbits	New Zealand White	22	-	4 - 5 months	2 - 3 kg	Medial condyle	Size: 3 mm / Depth: 3 mm	1) PLGA, 2) PLGA + EPCs, 3) Empty defect	EPCs	4 and 12 weeks	PLGA		Macroscopic evaluation, Semi-quantitative macroscopic evaluation, Histology, Immunohistochemistry, Semi-quantitative histological scoring, µCT	√
Chen14	2011	Rabbits	New Zealand White	6	-	2 months	3 kg (avg)	Trochlea	Size: 4.5 mm / Depth: 3 mm	1) Type II collagen scaffold, 2) Type II collagen scaffold + MSCs	MSCs	8 and 24 weeks	Type II collagen scaffold		Macroscopic evaluation, Histology, Immunohistochemistry	X
Chen15	2011	Rabbits	New Zealand White	36	-	4 months	-	Trochlea	Size: 4 mm / Depth: 5 mm	1) Hydroxyapatite/Chitosan-gelatin, 2) Hydroxyapatite/Chitosan-gelatin + MSCs, 3) BMP-2-activated monolayer bone graft + MSCs, 4) TGF-β1-activated monolayer cartilage graft + MSCs, 5) Empty defect	MSCs	4, 8 and 12 weeks	Hydroxyapatite/Chitosan-gelatin	TGF-β1, BMP-2	Macroscopic evaluation, Histology, Immunohistochemistry	X
Chen16	2014	Rabbits	New Zealand	30	M/F	Mature	2 - 2.5 kg	Medial condyle	Size: 4 mm / Depth: 3 mm	1) Ethylene glycol chitosan hydrogel, 2) Ethylene glycol chitosan hydrogel + chondrocytes, 3) Empty defect	Chondrocytes	12 weeks	Ethylene glycol chitosan hydrogel		Histology	X
Cheng17	2014	Rats	RNU	20	-	-	200 - 250 gram	Trochlea	Size: 2 mm / Depth: 2 mm	1) Fibrin hydrogel, 2) Fibrin hydrogel + embryonic stem cells	Embroynic stem cells	4 and 12 weeks	Fibrin hydrogel		Macroscopic evaluation, Histology, Immunohistochemistry, Semi-quantitative histological scoring	√
Christensen18	2012	Rabbits	New Zealand White	15	M	6 months	3 kg	Trochlea	Size: 4 mm / Depth: 3 mm	1) PCL, 2) PCL + chondrocytes, 3) Type I-III collagen scaffold + chondrocytes	Chondrocytes	13 weeks	PCL, Type I-III collagen scaffold (Chondro-GideR)		Macroscopic evaluation, Histology, Immunohistochemistry, Semi-quantitative histological scoring	√
Chung19	2014	Rats	Sprague-Dawley	20	M	18 weeks		Trochlea	Size: 2 mm / Depth: 3 mm	1) Hyaluronic acid hydrogel, 2) Alginate-pluronic hydrogel, 3) Hyaluronic acid-alginate-pluronic hydrogel, 4) Hyaluronic acid-alginate-pluronic-chitosan hydrogel, 5-8) + hUCB-MSCs	hUCB-MSCs	16 weeks	Hyaluronic acid hydrogel, Alginate-pluronic hydrogel, Hyaluronic acid-alginate-pluronic hydrogel, Hyaluronic acid-alginate-pluronic-chitosan hydrogel		Macroscopic evaluation, Semi-quantitative macroscopic evaluation, Histology, Immunohistochemistry, Semi-quantitative histological scoring	√
Cohen20	2003	Rabbits	New Zealand White	30	M	4 months	-	Trochlea	Size: 4 x 4 mm2 / Depth: 3 mm	1) Alginate hydrogel, 2) PGA-PLA (90%-10%)/Alginate hydrogel + chondrocytes, 3) PGA-PLA (50%-50%)/Alginate hydrogel + chondrocytes, 4) Empty defect	Chondrocytes	6 and 12 weeks	Alginate hydrogel, PGA-PLA (90%-10%)/Alginate hydrogel, PGA-PLA (50%-50%)/Alginate hydrogel		Macroscopic evaluation, Histology, Semi-quantitative histological scoring	√	X	Excluded from meta-analysis: Number of animals in group 2 and 3 unknown.
Cui21	2007	Rabbits	New Zealand White	72	-	2 months	1.8 - 2.3 kg	Femoral condyle	Size: 4 mm / Depth: Osteochondral defect	1) PLGA, 2) PLGA + BMP-2, 3) PLGA + MSCs, 4) Empty defect	MSCs	4, 8, 12, 24, 36 and 48 weeks	PLGA	rhBMP-2	Macroscopic evaluation, Histology, Semi-quantitative histological scoring	√	X	Excluded from methodological quality assessmen: article in Chinese. Excluded from meta-analysis: No standard deviations available.
Cui22	2009	Rabbits	New Zealand White	36	-	2 months	1.8 - 2.3 kg (avg: 2 kg)	Femoral condyle	Size: 4 mm / Depth: Osteochondral defect	1) PLGA, 2) PLGA + MSCs, 3) Empty defect	MSCs	4, 8, 12 and 24 weeks	PLGA		Macroscopic evaluation, Histology, Semi-quantitative histological scoring	√	X	Excluded from meta-analysis: No standard deviations available.
Dahlin23	2014	Rats	Lewis	40	M	12 weeks	300 - 250 gram	Trochlea	Size: 1.5 mm / Depth: 1.5 mm	1) PCL, 2) PCL + MSCs, 3) PCL + condrocytes, 4) PCL + MSCs + chondrocytes, 5) Empty defect	MSCs	12 weeks	PCL		Histology, Semi-quantitative histological scoring, µCT	√	X	Excluded from meta-analysis: No means and standard deviations available.
de Girolamo24	2015	Minipigs	Yucatan	7	M	12 months	73.5 ± 2.2 kg	Trochlea	Size: 9 mm / Depth: 8 mm	1) OPF hydrogel, 2) OPF hydrogel + autologous ASCs, 3) OPF hydrogel + allogeneic ASCs, 4) 2) OPF hydrogel + human ASCs, 5) Empty defect	ASCs	6 months	OPF hydrogel		Macroscopic evaluation, Histology, Immunohistochemistry, Semi-quantitative histological scoring, Biomechanical tests, MRI	√
Deng25	2014	Rabbits	New Zealand White	36	-	12 weeks	2.5 - 3 kg	Trochlea	Size: 15 x 10 mm / Depth: 5 mm	1) Gelatin-ceramic bovine bone/gelatin-chondroitin sulphate-sodium hyaluronate, 2) Gelatin-ceramic bovine bone/gelatin-chondroitin sulphate-sodium hyaluronate + chondrocyte + MSCs, 3) Empty defect	MSCs + chondrocytes	6, 12 and 24 weeks	Gelatin-ceramic bovine bone/gelatin-chondroitin sulphate-sodium hyaluronate		Macroscopic evaluation, Histology, Immunohistochemistry, Semi-quantitative histological scoring, PCR	√
Di26	2010	Rabbits	New Zealand White	30	M	34 - 37 weeks	3 - 4 kg	Trochlea	Size: 3 mm / Depth: Osteochondral defect	1) Alginate hydrogel, 2) Alginate hydrogel + chondrocytes, 3) Empty defect	Chondrocytes	8 and 12 weeks	Alginate hydrogel		Histology, Immunohistochemistry, Semi-quantitative histological scoring	√		Excluded from methodological quality assessmen: article in Chinese. Assumption for meta-analysis: maximum score = 14.
Diduch27	2000	Rabbits	New Zealand White	12	-	4 months	8 - 10 lb	Medial condyle	Size: 6 x 3 mm2 / Depth: 3 mm	1) Alginate hydrogel, 2) Alginate hydrogel + marrow stromal cells, 3) Empty defect	Bone marrow cells	2, 3, 4 and 8 weeks	Alginate hydrogel		Macroscopic evaluation, Histology	X
Ding28	2008	Rabbits	New Zealand White	18	M/F	3 months	3 ± 0.2 kg	Condyle	Size: 3 mm / Depth: 3 mm	1) PLGA, 2) PLGA + MSCs, 3) PLGA + MSCs (modified hIGF-1 gene), 4) Empty defect	MSCs	4, 8 and 12 weeks	PLGA	modified hIGF-1 gene	Macroscopic evaluation, Histology, Immunohistochemistry, Semi-quantitative histological scoring	√		Excluded from methodological quality assessmen: article in Chinese.
Dorotka29	2005	Sheeps	Austrian	27	-	3 - 5 years	78 kg (avg)	Medial condyle	Size: 4.5 mm / Depth: Full-thickness cartilage defect + microfracture (Size: - mm / Depth: 2 mm, 4 penetrations/defect)	1) Collagen scaffold, 2) Collagen scaffold + chondrocytes, 3) Empty defect, 4) Empty chondral defect and microfracture	Chondrocytes	4 and 12 months	Type type I-III collagen scaffold/Type II collagen scaffold		Macroscopic evaluation, Histology, Immunohistochemistry, Semi-quantitative histological scoring	√
Duan30	2013	Dogs	Beagle	12	-	1 year	13 - 16 kg	Trochlea	Size: 6 mm / Depth: 5 mm	1) Biphasic scaffold, 2) Biphasic scaffold + MSCs, 3) Empty defect	MSCs	3 months	Titanium/Type I collagen-glycosaminoglycans titanium biphasic scaffold		Macroscopic evaluation, Histology, Immunohistochemistry, Semi-quantitative histological scoring, µCT	√
Duan31	2014	Rabbits	New Zealand White	36	-	5 - 6 months	3 - 3.3 kg	Femoral condyle	Size: 4 mm / Depth: 5 mm	Chondral/Osseous: 1) 50-100 µm/300-450 µm), 2) 100-200 µm/300-450 µm), 3) 200-300 µm/200-300 µm), 4) 300-450 µm/100-200 µm, 5) 300-450 µm/50-100 µm, 6-10: condition 1-5 + MSCs, 11) Autologous osteochondral plug, 12) Empty defect	MSCs	6 and 12 weeks	PLGA/PLGA		Macroscopic evaluation, Histology, Immunohistochemistry, Semi-quantitative histological scoring	√
Endo32	2015	Rabbits	New Zealand White	15	M	12 weeks	2 kg (avg)	Trochlea	Size: 4 mm / Depth: 1 mm	1) Atellocollagen scaffold, 2) Atellocollagen scaffold + chondrocytes	Chondrocytes	4, 8 and 12 weeks	Atellocollagen scaffold		Macroscopic evaluation, Histology, Semi-quantitative histological scoring, Biochemical assay, MRI	√
Filova33	2007	Minipigs	-	9	-	-	-	Medial condyle	Size: 6 mm / Depth: 2 mm	1) Hydrogel, 2) Hydrogel + chondrocytes, 3) Empty defect	Chondrocytes	12 weeks and 6 months	Type I collagen-hyaluronate-fibrin hydrogel		Macroscopic evaluation, Histology, Immunohistochemistry, Semi-quantitative histological scoring, Histomorphometry, MRI	√
Filova34	2008	Rabbits	New Zealand White	19	M	2 months	2.8 kg	Trochlea	Size: 3 mm / Depth: 2 mm	1) Hydrogel, 2) Hydrogel + chondrocytes, 3) Empty defect	Chondrocytes	6 weeks	Type I collagen-hyaluronan-Tissucol-thrombin hydrogel		Macroscopic evaluation, Histology, Immunohistochemistry, Biomechanical tests	X
Fonseca35	2014	Sheeps	Ripollesa-Lacona	6	-	2 years	-	Medial condyle	Size: 3.5 mm / Depth: 5 mm	1) PLGA, 2) PLGA + chondrocytes, 3) Empty defect	Chondrocytes	12 and 20 weeks	PLGA		Macroscopic evaluation, Semi-quantitative macroscopic evaluation, Histology, Immunohistochemistry, Semi-quantitative histological scoring, MRI	√
Fragonas36	2000	Rabbits	New Zealand White	32	-	4 - 5 months	1.5 - 2 kg	Medial condyle	Size: 3 mm / Depth: - (Chondral defect + subchondral bone plate)	1) Alginate hydrogel, 2) Alginate hydrogel + chondrocytes	Chondrocytes	1, 2, 4 and 6 months	Alginate hydrogel		Macroscopic evaluation, Histology, MRI, SRIXE	X
Frenkel37	1997	Rabbits	New Zealand White	51	M	Adult	-	Trochlea	Size: 3 mm / Depth: - (Osteochondral defect)	1) Collagen scaffold, 2) Collagen scaffold + chondrocytes, 3) Empty defect	Chondrocytes	6, 12 and 24 weeks	Type I collagen (dense)/Type I collagen (porous)		Histology, Semi-quantitative histological scoring, Biochemical assays, Biomechanical tests, SDS-PAGE	√
Frohberg38	2016	Rats	Sprague-Dawley	18	F	6 months	~ 500 gr	Trochlea	Size: 1.8 mm / Depth: 1 mm	1) Bio-Gide®, 2) Bio-Gide® + chondrocytes, 3) Bio-Gide® + chondrocytes + rhAC	Chondrocytes	6 weeks	Bio-Gide®	recombinant acid ceramidase	Macroscopic evaluation, Histology, Immunohistochemistry, Semi-quantitative histological scoring, µCT	√
Gang39	2011	Rabbits	New Zealand	56	M/F	8 - 12 months?	1.8 - 2 kg	Trochlea	Size: 3 mm / Depth: 3 mm	1) Hydroxyapatite/Silk fibroin + TGF-β1 + IGF-1, 2) Hydroxyapatite/Silk fibroin + TGF-β1 + IGF-1 + ASCs, 3) Empty defect	ASCs	4, 8 and 12 weeks	Hydroxyapatite/Silk fibroin	TGF-β1, IGF-1	Macroscopic evaluation, Histology, CT, MRI	X
Gao40	2002	Rabbits	New Zealand White	9	-	4 months	-	Medial condyle	Size: 3 mm / Depth: 3 mm	1) ICP/HYAFF, 2) ICP/HYAFF + autologous MPCs, 3) ICP/ACP, 4) ICP/ACP + autologous MPCs	MPCs	4 and 12 weeks	Injectable calcium phosphate/Hyaluronic acid sponge (HYAFF 11 or ACP)		Macroscopic evaluation, Histology	X
Gao41	2012	Rabbits	New Zealand	40	F	6 - 8 months	2 - 3 kg	Intercondylar fossa	Size: check Jie / Depth: Full-thickness cartilage defect + microfracture (check Jie)	1) Fibrin hydrogel (chondral defect), 2) Fibrin hydrogel + BM-MNCs (chondral defect), 3) Microfracture + fibrin hydrogel, 4) Microfracture + fibrin hydrogel + BM-MNCs	BM-MNCs	8 and 12 weeks	Fibrin hydrogel		Macroscopic evaluation, Histology, Immunohistochemistry, Semi-quantitative histological scoring	√		Excluded from methodological quality assessmen: article in Chinese.
Getgood42	2012	Sheeps	Welsh Mountain	24	-	4.3 years	-	Proximal lateral trochlea sulcus and medial condyle	Size: 5.8 mm / Depth: 6 mm	1) Scaffold, 2) Scaffold + BMAC, 3) Scaffold + PRP, 4) Empty defect	BMAC	26 weeks	Type I collagen-chondroitin-6-sulphate-brushite/Type I collagen-chondroitin-6-sulphate (ChondroMimetic)	PRP	Macroscopic evaluation, Semi-quantitative macroscopic evaluation, Histology, Immunohistochemistry, Semi-quantitative histological scoring, Biomechanical tests	√
Gong43	2014	Pigs	Chang Feng hybrid	16	M/F	1 year	-	Trochlea	Size: 8 mm / Depth: 6 mm	1) PGA-PLA, 2) PGA-PLA + ASCs	ASCs	3 and 6 months	PGA-PLA		Macroscopic evaluation, Semi-quantitative macroscopic evaluation, Histology, Immunohistochemistry, Semi-quantitative histological scoring, Biochemical assays, Biomechanical tests, Proteome analysis	√
Guenther44	2014	Minipigs	-	10	-	-	-	Femoral condyle	Size: 7 mm / depth: 10	1) Spongy bone cylinder (Tutobone®)/Collagen membrane, 2) Spongy bone cylinder (Tutobone®)/Collagen membrane (Chondrogide®) + BMAC, 3) Spongy bone cylinder (Tutobone®), 4) Empty defect	BMAC	3 months	Spongy bone cylinder (Tutobone®)/Collagen membrane (Chondrogide®), Spongy bone cylinder (Tutobone®)		Macroscopic evaluation, Histology, Semi-quantitative histological scoring, Spectrometric analysis	√
Guo45	2007	Rabbits	New Zealand White	15	M/F	4 - 5 months	-	Trochlea	Size: 5 mm/ Depth: 5 mm	1) Chitosan, 2) Chitosan + MSCs, 3) Chitoson + TGF-β1-transfected MSCs	MSCs	12 weeks	Chitosan scaffold	TGF-β1-transfected MSCs	Macroscopic evaluation, Histology, Immunohistochemistry, Semi-quantitative histological scoring	√
Guo46	2010	Rabbits	New Zealand White	18	-	6 months	-	Medial condyle	Size: 3 mm / Depth: 3 mm	1) OPF hydrogel + GMP, 2) OPF hydrogel + GMP + MSCs, 3) OPF hydrogel + GMP + MSCs + TGF-β1	MSCs	12 weeks	OPF hydrogel + GMP	TGF-β1	Macroscopic evaluation, Histology, Semi-quantitative histological scoring	√
Gupta47	2015	Rabbits	New Zealand White	45	F	Adult	2.5 - 3 kg	Medial condyle	Size: 4.5 mm / Depth: 4.5 mm	1) Saline + bioactive molecules, 2) Chitosan–agarose–gelatin cryogel scaffold + bioactive molecules, 3) Chitosan–agarose–gelatin cryogel scaffold + chondrocytes + bioactive molecules	Chondrocytes	1, 2, 3, 4 and 6 weeks	Chitosan–agarose–gelatin cryogel scaffold	Protein fraction	Macroscopic evaluation, Histology, Immunohistochemistry, Semi-quantitative histological scoring, Haematological analysis	√
Han48	2009	Rabbits	New Zealand White	30	M/F	Adult	2 ± 0.5 kg	Condyle	Size: 4 mm / Depth: 2 mm	1) Collagen-chitosan-heparin-TGF-β1, 2) Collagen-chitosan-heparin-TGF-β1 + ASc, 3) Empty defect	ASCs	12 weeks	Collagen-chitosan-heparin scaffold	TGF-β1	Macroscopic evaluation, Histology, Immunohistochemistry	√		Excluded from methodological quality assessmen: article in Chinese.
Hao49	2006	Rabbits	Qingzilan	36	M/F	4 - 6 months	2.5 - 3.5 kg		Size: 5 mm / Depth: 3 mm	1) Hydroxyapatite-calcium phosphate/PLA, 2) Hydroxyapatite-calcium phosphate/PLA + MSCs, 3) Empty defect	MSCs	4, 8 and 12 weeks	Hydroxyapatite-calcium phosphate/PLA		Macroscopic evaluation, Histology, Immunohistochemistry, Semi-quantitative histological scoring	√	X	Excluded from meta-analysis: Maximum score scoring system unknown. The paper describes usage of the scoring system described in reference 3, but this reference does not contain histological scoring.
He50	2012	Rabbits	New Zealand White	24	M/F	4 months	1.4 - 1.7 kg	Trochlea	Size: 3.8 mm / Depth: 2 mm	1) Type I-III collagen membrane, 2) Type I-III collagen membrane + MSCs	MSCs	8 and 12 weeks	Type I-III collagen membrane		Macroscopic evaluation, Histology, Immunohistochemistry, Semi-quantitative histological scoring	√	X	Excluded from meta-analysis: Maximum score scoring system unknown. The paper describes usage of the scoring system described in reference 3, but this reference does not contain histological scoring.
Ho51	2010	Pigs	Yorkshire Duroc	-	-	6 months	-	Medial condyle and trochlea	Size: 8 mm / Depth: 8 mm	1) PCL-TCP/PCL + mesh, 2) PCL-TCP/PCL + MSCs + mesh, 3) PCL-TCP/PCL + MSCs	MSCs	6 months	PCL-TCP/PCL/PCL-collagen mesh		Macroscopic evaluation, Histology, Immunohistochemistry, Semi-quantitative histological scoring, Biomechanical tests, µCT	√
Igarashi52	2010	Rabbits	Japanese White	73	F	-	2.6 - 2.9 kg	Trochlea	Size: 5 mm / Depth: 3 mm	1) Commercial grade alginate, 2) Commercial grade alginate + MSCs, 3) Purified alginate, 4) Purified alginate + MSCs, 5) Empty defect	MSCs	2, 4 and 12 weeks	Alginate hydrogel (ultra-purified sodium alginate and commercial grade sodium alginate)		Macroscopic evaluation, Histology, Semi-quantitative histological scoring, Biomechanical tests	√	X	Excluded from meta-analysis: No standard deviations available.
Igarashi53	2012	Dogs	Beagle	12	F	-	~ 20 kg	Trochlea	Size: 5 mm / Depth: 5 mm	1) Alginate hydrogel, 2) Alginate hydrogel + MSCs, 3) Empty defect	MSCs	16 weeks	Alginate hydrogel		Macroscopic evaluation, Semi-quantitative macroscopic evaluation, Histology, Semi-quantitative histological scoring, Biomechanical tests	√
Im54	2010	Minipigs	-	16	F	23 - 25 months	50.5 ± 0.75 kg	Medial and lateral condyle	Size: 6 mm / Depth: 7 mm	1) Scaffold, 2) Scaffold + chondrocytes, 3) Osteochondral fragment, 4) ACI, 5) Empty defect	Chondrocytes	5 months	β-TCP-hydroxyapatite/Hyaluronic acid-atelocollagen		Macroscopic evaluation, Semi-quantitative macroscopic evaluation, Histology, Immunohistochemistry, Semi-quantitative histological scoring, Biomechanical tests	√
Im55	2010	Rabbits	New Zealand White	12	-	12 - 18 months	3.38 ± 0.12 kg	Trochlea	Size: 6 mm / Depth: 3 mm	1) PCL-pluronic F127-heparin, 2) PCL-pluronic F127-heparin + ASCs, 3) PCL-pluronic F127-heparin + BMP-2 + TGF-β2, 4) PCL-pluronic F127-heparin + BMP-2 + TGF-β2 + ASCs	ASCs	9 weeks	PCL-pluronic F127-heparin	TGF-β2, BMP-2	Macroscopic evaluation, Semi-quantitative macroscopic evaluation, Histology, Immunohistochemistry, Semi-quantitative histological scoring	√
Ito56	2005	Rabbits	Japanese White	12	M	12 weeks	2 kg (avg)	Trochlea	Size: 4 mm / Depth: 4 mm	1) Atelocollagen scaffold/Atelocollagen hydrogel + PLA mesh, 2) Atelocollagen scaffold/Atelocollagen hydrogel + PLA mesh + chondrocytes	Chondrocytes	4 and 12 weeks	Atelocollagen scaffold/Atelocollagen hydrogel + PLA mesh		Macroscopic evaluation, Semi-quantitative macroscopic evaluation, Histology, Immunohistochemistry, Semi-quantitative histological scoring	√
Ito57	2008	Rabbits	Japanese White	12	M	12 weeks	2 kg (avg)	Trochlea	Size: 4 mm / Depth: 6 mm	1) Calcium hydroxyapatite/Atelocollagen, 2) Calcium hydroxyapatite/Atelocollagen + chondrocytes	Chondrocytes	4 and 12 weeks	Calcium hydroxyapatite/Atelocollagen		Macroscopic evaluation, Semi-quantitative macroscopic evaluation, Histology, Immunohistochemistry, Semi-quantitative histological scoring	√
Jagodzinski58	2014	Minipigs	Göttingen	11	F	14 months	58.3 ± 6.7 kg	Medial and lateral condyle	Size: 7 mm / Depth: 10 mm	1) Conical bone cylinder/Type I-III collagen membrane, 2) Reverse osteochondral cylinders without cartilage layer, 3) Conical bone cylinder/Type I-III collagen membrane + BMAC, 4) Empty defect	BMAC	3 months	Conical bone cylinder/Type I-III collagen membrane (Chondrogide®)		Macroscopic evaluation, Semi-quantitative macroscopic evaluation, Immunohistochemistry, Semi-quantitative histological scoring, Biomechanical tests	√
Jang59	2014	Rabbits	New Zealand White	28	-	Adult	3.464 kg ± 441 gram	Trochlea	Size: 6 mm / Depth: 8 mm	1) Hydroxyapatite, 2) Hydroxyapatite + platelet-rich fibrin glue, 3) Hydroxyapatite + platelet-rich fibrin glue + MSCs, 4) Hydroxyapatite + platelet-rich fibrin glue + differenation MSCs, 5) Empty defect	MSCs	4 and 8 weeks	Hydroxyapatite ± platelet-rich fibrin glue		Macroscopic evaluation, Histology, Semi-quantitative histological scoring	√
Jiang60	2007	Minipigs	Lee-Sung	10	M/F	7 - 9 months	-	Medial and lateral condyle	Size: 8 mm / Depth: 8 mm	1) PLGA-β-TCP/PLGA, 2) PLGA-β-TCP/PLGA + chondrocytes, 3) Empty defect	Chondrocytes	6 months	PLGA-β-TCP/PLGA		Macroscopic evaluation, Semi-quantitative macroscopic evaluation, Histology, Immunohistochemistry, Semi-quantitative histological scoring, Biomechanical tests, X-ray	√
Jurgens61	2013	Goats	Dutch milk	8	F	Adult	82.4 ± 11.7 kg	Medial condyle and trochlea	Size: 5 mm / Depth: 3.5 mm	1) Type I-III collagen scaffold, 2) Type I-III collagen scaffold + SVF, 3) Type I-III collagen scaffold + ASCs	SVF, ASCs	1 and 4 months	Type I-III collagen scaffold (Optimaix®)		Macroscopic evaluation, Semi-quantitative macroscopic evaluation, Histology, Immunohistochemistry, Semi-quantitative histological scoring, Biochemical assays, PCR, Biomechanical tests, µCT	√
Kandel62	2006	Sheeps	-	18	-	-	-	Trochlea	Size: 4 mm / Depth: 6 mm	1) Calcium phosphate, 2) Calcium phosphate + chondrocytes	Chondrocytes	3-4 and 9 months	Calcium phosphate		Macroscopic evaluation, Histology, Immunohistochemistry, Biochemical assays, X-ray, backscatter electon imaging	X
Kang63	2012	Rabbits	New Zealand	22	-	6 months	4 kg	Trochlea	Size: 4 mm / Depth: 2 mm	1) Cartilage extracellular matrix-derived scaffold, 2) Cartilage extracellular matrix-derived scaffold + ASCs, 3) Empty defect	ASCs	3 and 6 months	Cartilage extracellular matrix-derived scaffold		Macroscopic evaluation, Semi-quantitative macroscopic evaluation, Histology, Immunohistochemistry, Semi-quantitative histological scoring, Biochemical assays and biomechanical tests (cellular biomaterial only)	√
Kayakabe64	2006	Rabbits	Japanese White	27	-	36 - 38 weeks	-	Trochlea	Size: 5 mm / Depth: 2 - 3 mm	1) Hyaluronic acid scaffold, 2) Hyaluronic acid scaffold + MSCs, 3) Hyaluronic acid scaffold + MSCs + FGF-2, 4) Atellocollagen hydrogel + MSCs + FGF-2, 5) Empty defect	MSCs	4 and 12 weeks	Hyaluronic acid scaffold, Atellocollagen hydrogel	FGF-2	Macroscopic evaluation, Histology, Immunohistochemistry, Semi-quantitative histological scoring	√
Kazemnejad65	2016	Rabbits	New Zealand	48	-	6 - 8 months	2 - 3.2 kg	Trochlea	Size: 4 mm / Depth: 3 mm	1) Fibrin glue + chondrocytes, 2) Silk fibroin scaffold, 3) Silk fibroin scaffold + chondrocytes, 4) Empty defect	Chondrocytes	12 and 36 weeks	Fibrin glue, Silk fibroin scaffold		Macroscopic evaluation, Semi-quantitative macroscopic evaluation, Histology, Immunohistochemistry, Semi-quantitative histological scoring, Biomechanical tests	√
Kon66	2010	Sheeps	Bergamasca-Massese	12	F	3 - 4 years	70 ± 5 kg	Femoral condyle	Size: 7 mm / Depth: 9 mm	1) Scaffold, 2) Scaffold + chondrocytes, 3) Empty defect	Chondrocytes	6 months	Hydroxyapatite(70%)-type I collagen(30%)/Hydroxyapatite(40%)-type I collagen(60%)/Type I collagen (Fin-Ceramica®)		Macroscopic evaluation, Semi-quantitative macroscopic evaluation, Histology, Immunohistochemistry, Semi-quantitative histological scoring, X-ray	√
Köse67	2005	Rabbits	Albino	20	-	4 months	3.25 kg	Trochlea	Size: 4.5 mm / Depth: 4 mm	1) Collagen-calcium phosphate scaffold, 2) Collagen-calcium phosphate scaffold + chondrocytes, 3) PHBV, 4) PHBV + chondrocytes	Chondrocytes	8 and 20 weeks	Collagen-calcium phosphate scaffold (CaP-Gelfix®), PHBV		Macroscopic evaluation, Semi-quantitative macroscopic evaluation, Histology, Semi-quantitative histological scoring	√
Kuo68	2015	Rabbits	-	12	-	-	-	Trochlea	Size: 4 mm / Depth: 2 mm	1) Gelatin-chondoitin-6-sulfate-hyaluronan cryogel scaffold, 2) Gelatin-chondoitin-6-sulfate-hyaluronan cryogel scaffold + chondrocytes, 3) Empty defect	Chondrocytes	4 and 12 weeks	Gelatin-chondoitin-6-sulfate-hyaluronan cryogel scaffold		Macroscopic evaluation, Histology, Immunohistochemistry, Biomechanical tests	X
Lee69	2012	Rabbits	New Zealand White	30	M	8 months	3.5 - 4 kg	Trochlea	Size: 4 mm / Depth: 3 mm	1) Type I collagen-hyaluronic acid-fibrinogen hydrogel, 2) Type I collagen-hyaluronic acid-fibrinogen hydrogel + SDMSCs, 3) Empty defect	SDMSCs	4 and 24 weeks	Type I collagen-hyaluronic acid-fibrinogen hydrogel		Macroscopic evaluation, Semi-quantitative macroscopic evaluation, Histology, Immunohistochemistry, Semi-quantitative histological scoring	√
Lee70	2013	Rabbits	New Zealand White	81	M	10 months	4 - 4.5 kg	Trochlea	Size: 4 mm / Depth: 3 mm	1) PRP hydrogel, 2) PRP hydrogel + SDMSCs, 3) Empty defect	SDMSCs	4, 12 and 24 weeks	PRP hydrogel	PRP	Macroscopic evaluation, Semi-quantitative macroscopic evaluation, Histology, Immunohistochemistry, Semi-quantitative histological scoring, Biochemical assays	√	X	Excluded from meta-analysis: Maximum score in the study results exceeds the maximum score described in reference.
Lee71	2014	Rabbits	New Zealand White	20	-	20 weeks	3.4 - 3.8 kg	Trochlea	Size: 7 mm / Depth: 2 mm	1) PLGA-Pluronic F127, 2) PLGA-Pluronic F127 + MSCs, 3) PLGA-Pluronic F127-PD98059 + MSCs, 4) PLGA-Pluronic F127-TGF-β2 + MSCs	MSCs	10 weeks	PLGA-Pluronic F127	TGF-β2	Macroscopic evaluation, Semi-quantitative macroscopic evaluation, Histology, Immunohistochemistry, Semi-quantitative histological scoring	√
Li72	2008	Rabbits	New Zealand White	36	M/F	4 - 6 months	2.5 - 3.5 kg	Trochlea	Size: 4 mm / Depth: 3 mm	1) CDBM, 2) CDBM + MSCs, 3) Empty defect	MSCs	4, 8 and 12 weeks	Cancellous demineralized bone matrix		Macroscopic evaluation, Immunohistochemistry, Semi-quantitative histological scoring	√	X	Excluded from meta-analysis: maximum score scoring system unknown. The paper describes usage of the scoring system described in reference 2, but this reference does not contain histological scoring.
Li73	2015	Rabbits	New Zealand White	14	-	4 - 6 months	2.5 - kg	Trochlea	Size: 4 mm / Depth: 2 mm	1) Poly(3-hydroxybutyrate-co-4-hydroxybutyrate), 2) Poly(3-hydroxybutyrate-co-4-hydroxybutyrate) + TGF-β1, 3) Poly(3-hydroxybutyrate-co-4-hydroxybutyrate) + ASCs + chondrocytes, 4) Empty defect	ASCs + chondrocytes	8 and 16 weeks	Poly(3-hydroxybutyrate-co-4-hydroxybutyrate)	TGF-β1	Histology, Immunohistochemistry	X
Li74	2015	Rabbits	New Zealand White	30	-	-	2.5 kg	Trochlea	Size: 4 mm / Depth: 6 mm	1) Hydroxyapatite-polyamide-6/PVA-gelatin-vanillin, 2) Hydroxyapatite-polyamide-6/PVA-gelatin-vanillin + MSCs, 3) Empty defect	MSCs	6 and 12 weeks	Hydroxyapatite-polyamide-6/PVA-gelatin-vanillin		Macroscopic evaluation, Histology, Semi-quantitative histological scoring, PCR	√
Lim75	2013	Minipigs	Prestige World Genetics	6	F	8 months	20 kg	Medial and lateral condyle	Size: 6 mm / Depth: 1 mm	1) OPF scaffold, 2) OPF scaffold + MSCs	MSCs	4 months	OPF scaffold		Macroscopic evaluation, Histology, Immunohistochemistry, Semi-quantitative histological scoring, Histomorphometry	√
Lin76	2006	Rabbits	New Zealand	27	M/F	3 - 4 months	??????????	Medial condyle and trochlea	Size: 5 mm / Depth: 3 mm	1) Collagen membrane, 2) Collagen membrane + MSCs, 3) Empty defect	MSCs	4, 8 and 12 weeks	Collagen membrane		Macroscopic evaluation, Semi-quantitative macroscopic evaluation, Histology, Immunohistochemistry, Semi-quantitative histological scoring, SEM	√		Excluded from methodological quality assessmen: article in Chinese.
Liu77	2006	Rabbits	New Zealand White	36	-	4 months	2.6 - 3 kg	Trochlea	Size: 5 mm / Depth: 5 mm	1) Hyaluronic acid-gelatin hydrogel, 2) MSCs, 3) Hyaluronic acid-gelatin hydrogel + MSCs, 4) Empty defect	MSCs	4, 8 and 12 weeks	Hyaluronic acid-gelatin hydrogel		Macroscopic evaluation, Histology, Semi-quantitative histological scoring	√	X	Excluded from meta-analysis: No standard deviations available.
Liu78	2010	Rabbits	New Zealand	30	M/F	6 months	1.4 - 1.7 kg	Intercondylar fossa	Size: 4 x 4 mm / Depth: 3 mm	1) PLGA-hydroxyapatite/Type I collagen hydrogel, 2) PLGA-hydroxyapatite/Type I collagen hydrogel + MSCs, 3) Empty defect	MSCs	1, 3, 6 and 9 months	Hydroxyapatite-type I collagen hydrogel/PLGA-type I collagen hydrogel		Macroscopic evaluation, Histology, Immunohistochemistry, Histomorphometry, µCT	X
Liu79	2014	Rabbits	New Zealand	39	-	Adult	2.5 - 3 kg	Trochlea	Size: 5 mm / Depth: 3 mm	1) PCL-gelatin scaffold, 2) PCL-gelatin scaffold + induced pluripotent stem cells, 3) Empty defect	Pluripotent stem cells	6 weeks and 3 months	PCL-gelatin scaffold		Macroscopic evaluation, Histology, PCR, µCT, Western Blot	X
Liu80	2014	Rabbits	New Zealand	24	M/F	4 months	4 ± 0.8 kg	Femoral condyle	Size: 4 mm / Depth: 3 mm	1) Human acellular amniotic membrane, 2) Human acellular amniotic membrane + MSCs, 3) Empty defect	MSCs	8 and 12 weeks	Human acellular amniotic membrane		Macroscopic evaluation, Histology, Semi-quantitative histological scoring	√
Lohan81	2014	Rabbits	New Zealand White	27	F	12 months	-	Trochlea	Size: 3.5 mm / Depth: 2.7 mm	1) PGA, 2) PGA + auricular chondrocytes, 3) PGA + articular chondrocytes, 4) Empty defect	Chondrocytes	6 and 12 weeks	PGA		Macroscopic evaluation, Semi-quantitative macroscopic evaluation, Histology, Immunohistochemistry, Semi-quantitative histological scoring, Biomechanical tests	√
Loken82	2008	Rabbits	New Zealand White	12	-	24 weeks	3.9 ± 0.4	Medial condyle	Size: 4 mm / Depth: 1.5 mm	1) HYAFF-11, 2) HYAFF-11 + MSCs	MSCs	24 weeks	Hyaluronan scaffold (HYAFF-11®)		Macroscopic evaluation, Histology, Semi-quantitative histological scoring, Histomorphometry	√
Lopiz-Morales83	2010	Rabbits	New Zealand White	26	-	5 months	2.3 - 29.9 kg	Medial condyle	Size: 4 mm / Depth: 5 mm	1) Alginate, 2) Alginate + MSCs, 3) Alginate + BMP-2, 4) Alginate + BMP-4, 5) Alginate + MSCs + BMP-2, 6) Alginate + MSCs + BMP-4, 7) Alginate + BMP-2 + BMP-4, 8) Empty defect, 9) Untreated knees	MSCs	12 weeks	Alginate hydrogel	BMP-2, BMP-4	Macroscopic evaluation, Histology, Histomorphometry	X
Ma84	2015	Rabbits	New Zealand White	24	M	Adult	3 ± 0.5 kg	Femoral condyle	Size: 4 mm / Depth: 2 mm	1) Type I collagen scaffold, 2) Type I collagen scaffold + ASCs, 3) Type I collagen scaffold + ASCs (transfected with BMP-14)	ASCs	12 weeks	Type I collagen scaffold		Macroscopic evaluation, Histology, Immunohistochemistry, Semi-quantitative histological scoring	√		Excluded from methodological quality assessmen: article in Chinese.
Maciulaitis85	2015	Rabbits	New Zealand White	27	M	4 - 5 months	3 - 4 kg	Medial condyle	Size: 3 mm / Depth: Osteochondral	1) Type I collagen membrane + polymerized fibrin, 2) Type I collagen membrane + polymerized fibrin + chondrocytes, 3) SZ2080 + polymerized fibrin, 4) SZ2080 + polymerized fibrin + chondrocytes, 5) Polymerized fibrin	Chondrocytes	1, 3 and 6 months	Type I collagen scaffold, SZ2080		Macroscopic evaluation, Histology, Immunohistochemistry, Semi-quantitative histological scoring, PCR	√
Marmotti86	2012	Rabbits	New Zealand White	50	-	< 16 weeks	-	Trochlea	Size: 4.5 mm / Depth: 4 mm	1) Hyaluronic acid + PRP/Cartilage/Hyaluronic acid + PRP, 2) HA + PRP/Cartilage-fibrin glue/Hyaluronic acid + PRP, 3) Hyaluronic acid + PRP/Fibrin glue/Hyaluronic acid + PRP, 4) Hyaluronic acid + PRP/Hyaluronic acid + PRP, 5) Empty defect	Cartilage tissue	1, 3 and 6 months	Hyaluronic acid (Hyaff-11®)/± fibrin glue/Hyaluronic acid	PRP	Macroscopic evaluation, Semi-quantitative macroscopic evaluation, Histology, Immunohistochemistry, Semi-quantitative histological scoring	√
Marmotti87	2013	Goats	Roccaverano	18	F	Adult	-	Trochlea	Size: 7 mm / Depth: 3.5 mm	1) Platelet-rich fibrin matrix/Fibrin glue/Hyaluronic acid, 2) Platelet-rich fibrin matrix/Fibrin glue + cartilage fragment/Hyaluronic acid, 3) Empty defect	Cartilage tissue	1, 3, 6 and 12 months	Platelet-rich fibrin matrix/Fibrin glue ± cartilage fragment/Hyaluronic acid		Macroscopic evaluation, Semi-quantitative macroscopic evaluation, Histology, Immunohistochemistry, Semi-quantitative histological scoring, Biomechanical tests	√
Masuoka88	2006	Rabbits	Japanese White	18	M	16 - 18 weeks	3 kg (avg)	Trochlea	Size: 4 mm / Depth: 2 mm	1) Type I atellocollagen scaffold/Type I atellocollagen membrane, 2) Type I atellocollagen scaffold/Type I atellocollagen membrane + ASCs, 3) Empty defect	ASCs	4 and 12 weeks	Type I atellocollagen scaffold/Type I atellocollagen membrane		Macroscopic evaluation, Semi-quantitative macroscopic evaluation, Immunohistochemistry, Semi-quantitative histological scoring	√
Mazaki89	2014	Rabbits	New Zealand White	38	F	-	2 - 2.5 kg	Medial condyle	Size: 3 mm / Depth: 3 mm	Exp 1: 1) Gelatin, 2) Gelatin + BMP-4, 3) Gelatin + CBD-BMP-4, 4) Empty defect. Exp 2: 1) Gelatin, 2) Gelatin + MSCs, 3) Empty defect	MSCs	4 and 12 weeks	Furfurylamine-conjugated gelatin hydrogel	BMP-4 and CBD-BMP-4	Macroscopic evaluation, Semi-quantitative macroscopic evaluation, Histology, Immunohistochemistry, Semi-quantitative histological scoring, µCT, PCR	√
Meppelink90	2016	Minipigs	MGH	4	-	-	-	Trochlea	Size: 2 mm / Depth: 5 mm	1) Type I collagen hydrogel, 2) 1) Type I collagen hydrogel + dynamic self-regenerating cartilage, 3) Osteochondral plug, 4) Empty defect	Chondrocytes	6 weeks	Type I collagen hydrogel		Macroscopic evaluation, Histology, Immunohistochemistry, Biochemical assays, Biomechanical tests	X
Miao91	2008	Rabbits	New Zealand White	27	M/F	Adult	1.5 - 2 kg	Femoral condyle	Size: 5 mm / Depth: 3 mm	1) Silk fibroin, 2) Silk fibroin + MSCs, 3) Empty defect	MSCs	4, 8 and 12 weeks	Silk fibroin		Histology, Immunohistochemistry	X
Miller92	2010	Rabbits	New Zealand White	12	F	11 months (avg)	4.7 kg (avg)	Trochlea	Size: 3 mm / Depth: 2 mm	1) KLD hydrogel, 2) KLD hydrogel + chondrogenic factors, 3) KLD hydrogel + chondrogenic factors + MSCs, 4) Empty defect	MSCs	12 weeks	KLD hydrogel	TGF-β1, streptavidine, dexamethasone, IGF-1	Macroscopic evaluation, Semi-quantitative macroscopic evaluation, Histology, Immunohistochemistry, Semi-quantitative histological scoring, x-ray	√
Mrosek93	2010	Rabbits	New Zealand White	10	-	Pilot: 3 months, Experiment: 8 months	-	Medial and lateral condyle	Pilot: Size: 3 mm / Depth: 6 mm; Experiment: Size: 5 mm / Depth: 6 mm	Pilot: 1) Tantalum, 2) Tantalum + periosteal graft + TGF-β1, 3) Empty defect; Experiment: 1) Tantalum/periosteum +TGF-β, 2) PCL/periosteum +TGF-β, 3) Empty defect	Periostal graft	Pilot: 6 and 12 weeks. Experiment: 15 weeks	Tantalum and PCL	TGF-β1	Macroscopic evaluation, Histology, Semi-quantitative histological scoring	X
Munirah94	2007	Sheeps	-	12	M	6 months	15 - 25 kg (avg: 20)	Medial and lateral condyle	Size: - / Depth: 2.5 mm	1) Fibrin hydrogel, 2) Fibrin hydrogel + chondrocytes, 3) ACI, 4) Empty defect	Chondrocytes	12 weeks	Fibrin hydrogel		Macroscopic evaluation, Semi-quantitative macroscopic evaluation, Histology, Semi-quantitative histological scoring	√	X	Excluded from meta-analysis: Results are only provided as median without ranges, which makes estimation of standard deviations impossible.
Necas95	2010	Minipigs	-	40	-	5 - 7 months	18 ± 4 kg	Medial and lateral condyle	Size: 6 mm / Depth: 12 mm	1) Type I collagen-chitosan scaffold, 2) Type I collagen-chitosan scaffold + MSCs, 3) Abrasive chondroplastics, 4) Forage, 5) Microfracture, 6) Mosaicplasty	MSCs	16 weeks	Type I collagen-chitosan scaffold		Macroscopic evaluation, Semi-quantitative macroscopic evaluation, Histology, Immunohistochemistry, Semi-quantitative histological scoring	√
Niederauer96	2000	Goats	Spanish	16	M	2 - 3 years	65.8 - 7.4 lb	Medial condyle and trochlea	Size: 2.8 mm / Depth: 4 mm	1) PLGA/PLGA, 2) 20% PLGA fibers-75:25 PLGA/10% PLGA fibers-75:25 PLGA, 3) 55:45 PLGA-20% bioglass/10% PLGA fibers-75:25 PLGA, 4) 75:25 PLGA-50% calcium sulfate/10% PLGA fibers-75:25 PLGA, 5-8) condition 1-4 + chondrocytes	Chondrocytes	16 weeks	PLGA, 45S5 Bioglass R, Calcium sulfate, PLGA fibers (or combinations, see conditions)		Macroscopic evaluation, Semi-quantitative macroscopic evaluation, Histology, Immunohistochemistry, Semi-quantitative histological scoring, Biomechanical tests	√
Noguchi97	1994	Rats	WKAH/Hkm	48	M	18 - 19 weeks		Trochlea	Size: 1.5 mm / Depth: 1.5 mm	1)Type I collagen hydrogel, 2) Type I collagen hydrogel + chondrocytes (isograft), 3) Type I collagen hydrogel + chondrocytes (allograft)	Chondrocytes	2, 4, 12, 26 and 52 weeks	Type I collagen hydrogel		Macroscopic evaluation, Histology, Semi-quantitative histological scoring	√	X	Excluded from meta-analysis: Missing data.
Oliveira98	2010	Rabbits	New Zealand White	12	F	10 - 11 weeks	2.4 - 2.6 kg	Medial condyle	Size: 4 mm / Depth: Full-thickness cartilage defect + 1 mm subchondral bone	1) Gellan gum hydrogel, 2) Gellan gum hydrogel + ASCs, 3) Gellan gum hydrogel + predifferentiated ASCs, 4) Gellan gum hydrogel + chondrocytes, 5) Empty defect	ASCs, chondrocytes	1, 4 and 8 weeks	Gellan gum hydrogel	TGF-β1, BMP-2	Macroscopic evaluation, Histology, Semi-quantitative histological scoring, PCR	√	X	Excluded from meta-analysis: Means and standard deviations similar for all groups, requested data file contained errors.
Oshima99	2005	Rats	-	32	F	12 weeks	-	Medial condyle	Size: 1.5 mm / Depth: 3 mm	1) Fibrin glue, 2) Fibrin glue + MSCs	MSCs	2, 4, 12 and 24 weeks	Fibrin glue		Macroscopic evaluation, Histology	X
Oshima100	2009	Rabbits	New Zealand White	52	F	9 - 15 months	3.5 - 4.5 kg	Medial condyle	Size: 3.7 mm / Depth: 3 mm	1) PLA, 2) PLA + MSCs, 3) Empty defect	MSCs	1, 4, 12 and 24 weeks	PLA		Macroscopic evaluation, Histology, Immunohistochemistry	X
Pan101	2015	Rabbits	New Zealand White	24	-	5 - 6 months	2.9 - 3.2 kg	Medial and lateral condyle	Size: 4 mm / Depth: 5 mm	1) PLGA (92%: 77% porosity), 2) PLGA (92%: 77% porosity) + MSCs, 3) PLGA (85%: 85% porosity), 4) PLGA (85%: 85% porosity) + MSCs, 5) PLGA (77%: 92% porosity), 6) PLGA (77%: 92% porosity) + MSCs, 7) Osteochondral plug, 8) Empty defect	MSCs	6 and 12 weeks	PLGA		Macroscopic evaluation, Histology, Immunohistochemistry, Fluorescent staining, PCR	√
Pei102	2009	Rabbits	New Zealand White	18	M	8 months	3.5 - 4 kg	Medial condyle	Size: 4 mm / Depth: 5 mm	1) Fibrin glue-saturated Collagraft/PGA-fibrin, 2) Fibrin glue-saturated Collagraft/PGA-fibrin + SDMSCs, 3) Empty defect	SDMSCs	3 weeks and 6 months	Fibrin glue-saturated Collagraft®/PGA-fibrin		Macroscopic evaluation, Histology, Immunohistochemistry, Semi-quantitative histological scoring, X-ray	√
Perka103	2000	Rabbits	New Zealand White	28	M	Adult	-	Trochlea	Size: 3 mm / Depth: 2.5 mm	1) Fibrin hydrogel, 2) Fibrin hydrogel + periosteal cells, 3) Fibrin hydrogel + TGF-β1 + periosteal cells, 4) Empty defect	Periosteal cells	4 and 12 weeks	Fibrin hydrogel	TGF-β1	Macroscopic evaluation, Histology, Semi-quantitative histological scoring, Histomorphometry, TEM	√
Perka104	2000	Rabbits	New Zealand White	24	-	6 months	-	Trochlea	Size: 4 mm / Depth: Osteochondral	1) PGLA/polydioxanone, 2) PGLA/polydioxanone + chondrocytes, 3) Empty defect	Chondrocytes	4 and 12 weeks	PGLA/polydioxanone		Macroscopic evaluation, Histology, Semi-quantitative histological scoring	√	X	Excluded from meta-analysis: No standard deviations available.
Pilliar105	2007	Sheeps	-	12 (Experiment 1: 9, Experiment 2: 3)	-	6 - 9 months	-	Trochlea and femoral condyle?	Size: - mm / Depth: - mm (Implant length: 6 mm, diameter: 4 mm)	1) Calcium polyphosphate, 2) Calcium polyphosphate + chondrocytes	Chondrocytes	Experiment 1: 3 - 4 months, Experiment 2: 9 months	Calcium polyphosphate		Histology, Biomechanical tests, X-ray	X
Qi106	2010	Rabbits	New Zealand White	42	M/F	6 weeks	2.5 kg	Lateral condyle	Size: 3 mm / Depth: 3 mm	1) Demineralized bone matrix/Fibrin glue, 2) Demineralized bone matrix/Fibrin glue + chondrocytes, 3) Empty defect	Chondrocytes	4, 8 and 12 weeks	Demineralized bone matrix/Fibrin glue		Macroscopic evaluation, Histology, Semi-quantitative histological scoring	√		Excluded from methodological quality assessmen: article in Chinese.
Qi107	2014	Rabbits	New Zealand White	18	M	-	2.5 - 3 kg	Trochlea	Size: 4 mm / Depth: 3 mm	1) PLGA, 2) PLGA + MSCs, 3) PLGA + MSCs, encapsulated with MSCs sheet	MSCs	6 and 12 weeks	PLGA		Macroscopic evaluation, Histology, Semi-quantitative histological scoring, Histomorphometry	√
Reyes108	2013	Rabbits	New Zealand	42	M	6 months	3 - 4 kg	Intercondylar fossa	Size: 4.5 mm / Depth: 4 mm	1) Scaffold, 2) Sc. + BMP-2-loaded microspheres (middle layer), 3) Scaffold + MSCs, 4) Scaffold + chondrocytes, 5) Sc. + BMP-2-loaded microspheres (middle layer) + MSCs, 6) Sc. + BMP-2-loaded microspheres (middle layer) + chondrocytes, 7) Empty defect	Chondrocytes, MSCs	6 and 12 weeks	PLGA/Alginate hydrogel-PLGA microspheres/Alginate hydrogel-PLGA microspheres	BMP-2	Histology, Immunohistochemistry, Semi-quantitative histological scoring	√
Rudert109	2005	Rabbits	New Zealand White	33	F	5 - 6 months	3.5 - 5.5 kg	Trochlea and medial and lateral condyle	Size: 4 mm / Depth: 3 mm	1) Lyophilized dura, 2) Lyophilized dura + chondrocytes, 3) Ethisorb, 4) Ethisorb + chondrocytes, 5) PLLA, 6) PLLA + chondrocytes, 7) Empty defect	Chondrocytes	6 weeks, 6 and 12 months	Dura (mainly collagen type I), PLLA, Ethisorb (polydioxanon/polyglactin polymer) 210		Macroscopic evaluation, Semi-quantitative macroscopic evaluation, Histology, Immunohistochemistry, Semi-quantitative histological scoring, SEM	√	X	Excluded from meta-analysis: No means and standard deviations available.
Sancho-Tello110	2015	Rabbits	New Zealand	33	M	2 months	1.5 - 2 kg	Trochlea	Size: 3 mm / Depth: 1 mm	1) Poly(ethyl acrylate-co-hydroxyethyl acrylate), 2) Poly(ethyl acrylate-co-hydroxyethyl acrylate) + chondrocytes, 3) Empty defect	Chondrocytes	1 and 2 weeks, and 1, 3, and 12 months	Poly(ethyl acrylate-co-hydroxyethyl acrylate)		Macroscopic evaluation, Histology, Immunohistochemistry	X
Schaefer111	2002	Rabbits	New Zealand White	24	F	8 months	3.5 - 3.9 kg	Trochlea	Size: 7 x 5 mm / Depth: 5 mm	1) Collagraft/PGA, 2) Collagraf/PGA + chondrocytes, 3) Collagraft + bone marrow/PGA + chondrocytes, 4) Empty defect	Bone marrow, chondrocytes	6 weeks and 6 months	Collagraft (type I collagen, hydroxyapatite, TCP)/PGA		Macroscopic evaluation, Histology, Immunohistochemistry, Semi-quantitative histological scoring, Biochemical assays, Biomechanical tests	√
Schagemann112	2009	Sheeps	Merino	12	-	4 - 6 years	75 - 85 kg	Medial condyle	Size: 6 mm / Depth: 12 mm	1) Alginate-gelatin hydrogel, 2) Alginate-gelatin hydrogel + chondrocytes, 3) Alginate-gelatin hydrogel + periosteal cells, 4) Empty defect	Chondrocytes, periosteal cells	16 weeks (19 weeks for empty defects)	Alginate-gelatin hydrogel		Macroscopic evaluation, Histology, Immunohistochemistry, Semi-quantitative histological scoring	√
Schleicher113	2013	Sheeps	Merino	12	F	2 years	41.8 ± 3.6 kg	Medial and lateral condyle	Size: 9.4 mm / Depth: 11 mm	1) Hydroxyapatite-collagen/Type type I-III collagen scaffold, 2) Hydroxyapatite-collagen/Type type I-III collagen scaffold + chondrocytes, 3) Allogenous bone/Type type I-III collagen scaffold + chondrocytes	Chondrocytes	6 weeks	Hydroxyapatite-collagen/Type type I-III collagen scaffold, Allogenous bone/Type type I-III collagen scaffold		Macroscopic evaluation, Semi-quantitative macroscopic evaluation, Histology, Immunohistochemistry, Histomorphometry, PCR	X
Seo114	2013	Horse	Thoroughbred	6	F	5 ± 3.4 years	433.2 ± 92.3 kg	Trochlea (talus)	Size: 4.5 mm / Depth: 10 mm	1) β-TCP/Gelatin scaffold, 2) β-TCP/Gelatin scaffold + MSCs + BMP-2/β-TCP/Gelatin scaffold + chondrocytes + MSC + PRP	MSCs + chondrocytes	4 months	β-TCP/Gelatin scaffold	PRP, BMP-2	Macroscopic evaluation, Semi-quantitative macroscopic evaluation, Histology, Immunohistochemistry, Semi-quantitative histological scoring, µCT, X-ray	√
Seol115	2013	Rats	Sprague-Dawley	9	-	6 months	-	Trochlea	Size: 0.75 mm / Depth: 2 - 3 mm	1) Pluronic F-127-sodium hyaluronate hydrogel, 2) Pluronic F-127-sodium hyaluronate hydrogel + MSCs, 3) Empty defect	MSCs	4 weeks	Pluronic F-127-sodium hyaluronate hydrogel		Histology	X
Shao116	2006	Rabbits	New Zealand White	12	-	- (closed epiphyses)	3 - 3.5 kg	Medial condyle	Size: 4 mm / Depth: 5 mm	1) PCL/Fibrin glue, 2) PCL + MSCs/Fibrin glue + MSCs	MSCs	3 and 6 months	PCL/Fibrin glue		Macroscopic evaluation, Histology, Immunohistochemistry, µCT	X
Shao117	2006	Rabbits	New Zealand White	21	-	5 - 6 months	3 - 3.5 kg	Medial condyle	Size: 4 mm / Depth: 5.5 mm	1) PCL-TCP-fibrin glue/PCL-fibrin glue, 2) PCL-TCP-fibrin glue + MSCs/PCL-fibrin glue + MSCs	MSCs	6 weeks, 3 and 6 months	PCL-TCP-fibrin glue/PCL-fibrin glue		Macroscopic evaluation, Histology, Immunohistochemistry, Semi-quantitative histological scoring, Biomechanical tests	√
Shimomura118	2014	Rabbits	New Zealand White	41	-	Adult	-	Trochlea	Size: 5 mm / Depth: 6 mm	1) Hydroxyapatite, 2) Hydroxyapatite/in vitro tissue-engineered construct by SDMSCs, 3) Normal knees	SDMSCs	1, 2 and 6 months	Hydroxyapatite ± in vitro tissue-engineered construct		Macroscopic evaluation, Histology, Semi-quantitative histological scoring, Biomechanical tests	√
Solchaga119	2002	Rabbits	New Zealand White	33	-	4 months	2.6 - 3 kg	Medial condyle	Size: 3 mm / Depth: 3 mm	1) Fibronectin-coated hyaluronan-based hydrogel, 2) Fibronectin-coated hyaluronan-based hydrogel + bone marrow, 3) Empty defect (previous experiment)	Bone marrow	2, 3, 4, 12 and 24 weeks	Fibronectin-coated hyaluronan-based hydrogel (ACP™)		Macroscopic evaluation, Histology, Immunohistochemistry, Semi-quantitative histological scoring	√
Song120	2006	Rabbits	New Zealand White	80	M/F	5 months	1.55 kg	Trochlea	Size: 3 mm / Depth: 5 mm	1) Type I collagen scaffold, 2) Type I collagen scaffold + chondrocytes, 3) Type I collagen scaffold + chondrocytes (IGF-1 transfected), 4) Autologous cartilage, 5) Empty defect	Chondrocytes, autologous cartilage	4, 8, 16 and 24 weeks	Type I collagen scaffold	IGF-1 transfected chondrocytes	Histology, Semi-quantitative histological scoring	√		Excluded from methodological quality assessmen: article in Chinese.
Sosio121	2015	Pigs	Large White	6	-	4 months	70 kg	Trochlea	Size: 8 mm / Depth: 9 mm	1) Hydroxyapatite/Type I collagen scaffold, 2) Hydroxyapatite/Type I collagen scaffold + chondrocytes, 3) Empty defect	Chondrocytes	12 weeks	Hydroxyapatite/Type I collagen scaffold		Macroscopic evaluation, Semi-quantitative macroscopic evaluation, Histology, Immunohistochemistry, Semi-quantitative histological scoring, Biomechanical tests, Biochemical assay	√	X	Excluded from meta-analysis: Missing data.
Tan122	2011	Rabbits	New Zealand White	27	M/F	-	2.5 kg	Intercondylar fossa	Size: 4 mm / Depth: Osteochondral defect	1) Bone/cartilage scaffold, 2) Bone/cartilage scaffold + MSCs-chondrocytes, 3) Empty defect	MSCs + chondrocytes	4, 8 and 12 weeks	Bone/cartilage scaffold		Macroscopic evaluation, Histology, Semi-quantitative histological scoring	√	X	Excluded from meta-analysis: No standard deviations available.
Tanaka123	2005	Rabbits	New Zealand White	18	-	-	3 - 3.3 kg	Intercondylar fossa	Size: 4.2 mm / Depth: 6 mm	1) β-TCP, 2) β-TCP + chondrocytes	Chondrocytes	8, 12 and 30 weeks	β-TCP		Macroscopic evaluation, Histology, Immunohistochemistry, Semi-quantitative histological scoring	X
Tatebe124	2005	Rabbits	Japanese White	16	-	6 months	2 - 3 kg	Trochlea	Size: 10 x 5 mm / Depth: 2 mm	1) PGA/Seprafilm, 2) PGA/Seprafilm + MSCs, 3) Empty defect	MSCs	2, 4, 8 and 42 weeks (acellular 8 weeks)	PGA/sodium hyaluronate and carboxymethylcellulose sheet (Seprafilm)		Macroscopic evaluation, Semi-quantitative macroscopic evaluation, Histology, Immunohistochemistry, Semi-quantitative histological scoring, Histomorphometry	√	X	Excluded from meta-analysis: Time point PGA control group unknown.
Veronesi125	2015	Rabbits	New Zealand	10	M	5 months	3 ± 0.3 kg	Medial condyle	Size: 4 x 4 mm / Depth: Osteochondral	1) Type I collagen scaffold, 2) Type I collagen scaffold + pulsed electromagnetic fields stimulation, 3) Type I collagen scaffold + mononuclear cells, 4) Type I collagen scaffold + pulsed electromagnetic fields stimulation + mononuclear cells	Mononuclear cells	40 days	Type I collagen scaffold		Macroscopic evaluation, Histology, Semi-quantitative histological scoring	√
Wakitani126	1994	Rabbits	New Zealand White	86	-	4 months	2.5 kg (avg)	Medial condyle	Size: 6 x 3 mm / Depth: 3 mm	1) Collagen hydrogel, 2) Collagen hydrogel + MSCs, 3) Collagen hydrogel + periostium-derived MSCs, 4) Empty defect	MSCs	2, 4, 12 and 24 weeks	Type I collagen hydrogel		Macroscopic evaluation, Histology, Semi-quantitative histological scoring, Biomechanical tests	√	X	Excluded from meta-analysis: No standard deviations available.
Wang127	2006	Rabbits	Japanese	30	M/F	5 months	2 - 2.5 kg	Trochlea	Size: 4.5 mm / Depth: 5 mm	1) Type I collagen hydrogel, 2) Type I collagen hydrogel + MSCs + dexamethasone inducing, 3) Type I collagen hydrogel + MSCs + dexamethasone + TGF-β1	MSCs	6 and 12 weeks	Type I collagen hydrogel	Dexamethason, TGF-β (both only in vitro cultured with the cells)	Histology, Semi-quantitative histological scoring	√		Excluded from methodological quality assessmen: article in Chinese.
Wang128	2007	Rabbits	-	30	M/F	3 - 4 months	2 - 3 kg	Lateral condyle	Size: 3 mm / Depth: 3 mm	1) PLA, 2) PLA + bone marrow monocytes, 3) Empty defect	Bone marrow monocytes	4, 8 and 12 weeks	PLA		Macroscopic evaluation, Histology, Semi-quantitative histological scoring	√		Excluded from methodological quality assessmen: article in Chinese.
Wang129	2010	Rabbits	New Zealand White	21	-	3 months	2 - 2.5 kg	Trochlea	Size: 4 mm / Depth: 4 mm	1) PLGA-fibrin hydrogel-(TMC-pDNA-TGF-β1 complexes), 2) PLGA-fibrin hydrogel + MSCs, 3) PLGA-fibrin hydrogel-(TMC-pDNA-TGF-β1 complexes) + MSCs	MSCs	12 weeks	PLGA-fibrin hydrogel	TGF-β1	Macroscopic evaluation, Histology, Immunohistochemistry, Semi-quantitative histological scoring, PCR	√
Wang130	2014	Pigs	Diannan-small-ear	12	-	8 months	12 kg	Medial and lateral condyle	Size: 7 mm / Depth: 4 mm	1) Demineralized bone matrix, 2) Demineralized bone matrix + MSCs, 3) Demineralized bone matrix + Ad - BMP-2 and Ad-TGF-β3-infected MSCs, 4) Empty defect	MSCs	2, 4, 8 and 12 weeks	Demineralized bone matrix	BMP-2 and Ad-TGF-β3-infected MSCs	Macroscopic evaluation, Histology, Semi-quantitative histological scoring	√
Wang131	2015	Rabbits	New Zealand White	18	M	12 months	3.5 kg	Femoral condyle	Size: 5 mm / Depth: 3 mm	1) Self-assembling peptide hydrogel, 2) Self-assembling peptide hydrogel + chondrogenic factors, 3) Self-assembling peptide hydrogel + chondrogenic factors + MSCs, 4) Empty defect	MSCs	12 weeks	Self-assembling peptide hydrogel	TGF-β1, dexamethasone, IGF-1	Macroscopic evaluation, Semi-quantitative macroscopic evaluation, Histology, Immunohistochemistry, Histomorphometry, Semi-quantitative histological scoring, X-ray	√		Excluded from methodological quality assessmen: article in Chinese.
Wang132	2016	Rabbits	New Zealand White	18	-	15 weeks	3.87 ± 21 gr	Medial and lateral condyle	Size: 3 mm / Depth: 3 mm	1) Gelatin scaffold, 2) Gelatin scaffold + chondrocytes, 3) Periostium + chondrocytes, 4) Empty defect	Chondrocytes	2, 4 and 6 months	Gelatin scaffold		Macroscopic evaluation, Histology, Immunohistochemistry, Histomorphometry, Semi-quantitative histological scoring, Biomechanical tests	√
Wayne133	2005	Dogs	Mixed breed	10	-	Adult	~ 25 kg	Medial and lateral condyle	Size: 6 mm / Depth: 4 mm	1) PLA-alginate amalgam, 2) PLA-alginate amalgam + MSCs	MSCs	6 weeks	PLA-alginate amalgam		Macroscopic evaluation, Semi-quantitative macroscopic evaluation, Histology, Immunohistochemistry, Semi-quantitative histological scoring, Biomechanical tests, SEM	√
Wegener134	2010	Sheeps	Merino	9	-	Adult	< 60 kg	Medial condyle	Size: 8 mm / Depth: Full-thickness cartilage defect + microfracture (PLA anchor; Size: 1 mm, Depth: 4 mm, 4 penetrations/defect)	1) PLA/PGA, 2) PLA/PGA-fibrin glue + bone marrow cells, 3) Empty defects	Bone marrow cells	12 weeks	PLA/PGA ± fibrin glue		Macroscopic evaluation, Histology, Immunohistochemistry, Semi-quantitative histological scoring	√
Wu135	2008	Rabbits	New Zealand	18	M/F	6 months	-	Trochlea	Size: 4 mm / Depth: 4 mm	1) Hydroxyapatite/Polyamide 66, 2) Hydroxyapatite/Polyamide 66 + MSCs, 3) Empty defect	MSCs	1 and 4 months	Hydroxyapatite/Polyamide 66		Macroscopic evaluation, Histology, Immunohistochemistry	X
Xie136	2010	Rabbits	New Zealand White	18	-	5 - 6 months	3 kg	Medial condyle	Size: 4.5 mm / Depth: 5 mm	1) PCLC, 2) PCLC + MSCs, 3) Empty defect	MSCs	3 and 6 months	PLCL		Macroscopic evaluation, Histology, Immunohistochemistry, Semi-quantitative histological scoring, Biochemical assays	√
Xie137	2012	Rabbits	New Zealand White	42	M	Adult	2.5 - 3 kg	Trochlea	Size: 4 mm / Depth: 3 mm	1) PRP hydrogel, 2) PRP hydrogel + ASCs, 3) PRP hydrogel + MSCs, 4) Empty defect	ASCs, MSCs	6, 9 and 12 weeks	PRP hydrogel		Macroscopic evaluation, Semi-quantitative macroscopic evaluation, Histology, Immunohistochemistry, Semi-quantitative histological scoring, PCR, Western blot, µCT	√
Yan138	2007	Rabbits	New Zealand White	36	-	Adult	2.5 - 3.5 kg	Trochlea	Size: 4.5 mm / Depth: 3 mm	1) PLA, 2) PLA + chondrocytes, 3) PLA + MSCs, 4) PLA + fibroblasts, 5) PLA + umbilical cord blood stem cells	Chondrocytes, MSCs, fibroblasts, umbilical cord blood stem cells	6 and 12 weeks	PLA		Macroscopic evaluation, Histology, Immunohistochemistry, Semi-quantitative histological scoring	√
Yang139	2009	Rabbits	New Zealand	36	M/F	-	-	Trochlea	Size: ? mm / Depth: ? Mm	1) Cancellous bone scaffold, 2) Cancellous bone scaffold + ASCs (in vitro stimulated with cartilage-derived morphogenetic protein growth factor 1)	ASCs	8, 16, 24 and 48 weeks	Cancellous bone scaffold	Cartilage-derived morphogenetic protein growth factor 1	Histology	X
Yang140	2011	Dogs	-	12	M	2 years	20 - 25 kg	Medial and lateral condyle	Size: 4.2 mm / Depth: 6 mm	1) DCBM/DCM, 2) DCBM/DCM + MSCs	MSCs	3 and 6 months	DCBM/DCM		Macroscopic evaluation, Semi-quantitative macroscopic evaluation, Histology, Immunohistochemistry, Semi-quantitative histological scoring, Biochemical assays, Biomechanical tests, µCT	√
Yin141	2005	Rabbits	New Zealand White	32	M/F	4 months	2 - 3 kg	Medial condyle	Size: 3 mm / Depth: 3 mm	1) Cancellous bone/Cortical bone matrix, 2) Cancellous bone/Cortical bone matrix + MSCs, 3) Empty defect	MSCs	1, 3 and 6 months	Cancellous bone/Cortical bone matrix		Macroscopic evaluation, Histology, Immunohistochemistry, Semi-quantitative histological scoring	√		Excluded from methodological quality assessmen: article in Chinese.
Yin142	2016	Rats	Sprague–Dawley	72	M	-	300 - 350 gr	Trochlea	Size: 2 mm / Depth: 2 mm	1) Fibrin glue, 2) Cartilage ECM-derived particles + fibrin glue, 3) Cartilage ECM-derived particles + fibrin glue + MSCs	MSCs	6 and 12 weeks	Cartilage ECM-derived particles ± fibrin glue		Macroscopic evaluation, Histology, Immunohistochemistry, Biomechanical tests, µCT, Gait analysis, In vivo tracking	√
Zhao143	2013	Rabbits	New Zealand White	24	M	Adult	2.5 - 3 kg	Trochlea	Size: 4 mm / Depth: Full-thickness cartilage defect (2 mm) + microfracture (Size: 17G needle, Depth: -, - penetrations/defect)	1) Microfracture, 2) Microfracture + PGA, 3) Microfracture + PGA + BMAC, 4) Microfracture + PGA + MSCs, 5) Empty defect	BMAC, MSCs	8 weeks	PGA		Macroscopic evaluation, Histology, Immunohistochemistry, Semi-quantitative histological scoring, Biochemical assays	√		Assumption for meta-analysis: n = 4/group.
Zhao144	2015	Rabbits	Japanese White	54	M/F	-	3 ± 0.2 kg	Medial condyle	Size: 4 mm / Depth: 3 mm	1) Chitosan hydrogel, 2) Chitosan hydrogel + chondrocytes, 3) Empty defect	Chondrocytes	4, 8 and 12 weeks	Chitosan hydrogel		Macroscopic evaluation, Semi-quantitative macroscopic evaluation, Histology, Immunohistochemistry, Semi-quantitative histological scoring	√
Zhou145	2008	Rabbits	New Zealand White	30	-	9 - 10 months	3.5 kg (avg)	Trochlea	Size: 3.2 mm / Depth: 6 mm	1) Hydroxyapatite/Fibrin glue/PGA, 2) Hydroxyapatite/Fibrin glue/PGA + MSCs, 3) Empty defect	MSCs	16 and 32 weeks	Hydroxyapatite/Fibrin glue/PGA		Macroscopic evaluation, Histology, Immunohistochemistry, Semi-quantitative histological scoring	√
Zhu146	2016	Rabbits	New Zealand White	18	M/F	Adult	2 - 2.5 kg	Medial condyle	Size: 4.5 mm / Depth: 5 mm	1) Nano-hydroxyapatite/PLLA, 2) Nano-hydroxyapatite/PLLA + MSCs, 3) Empty defect	MSCs	12 and 24 weeks	Nano-hydroxyapatite/PLLA		Macroscopic evaluation, Histology, Immunohistochemistry, Semi-quantitative histological scoring	√
Remarks
*	Data from Dorotka et al. (OsteoArthritis and Cartilage (2005) 13, 655-664) was similar to Dorotka et al. (Biomaterials (2005) 26, 3617-3629). The latter study was excluded for this reason.
	Data from Schaefer et al. (Arthritis & Rheumatism (2002) 46, 2524-2534) was similar to Schäfer et al. (Orthopäde (2004) 33, 721-726). The latter study was excluded for this reason.
