# Supplementary material for: Augmented cartilage regeneration by implantation of cellular versus acellular implants after bone marrow stimulation: a systematic review and meta-analysis of animal studies
Source: PeerJ. 2017 Oct 27;5:e3927. doi: 10.7717/peerj.3927 (PMC5661456; doi:10.7717/peerj.3927)
Supplement: Supplemental Information 7 [file peerj-05-3927-s007.xlsx]

## Sheet: Blad 1
Supplementary Information 5. Risk of bias results per individual study.
For reference list, see Supplementary Information 4.
Author	Year of publication	1. Was the allocation sequence adequately generated and applied?	1. Answer?	2. Were the groups similar at baseline or were they adjusted for confounders in the analysis	2.1. # conditions/animal?	2.1. Answer?	2.2. Dividing of characteristics over groups?	2.2. Answer?	2.3: Difference between groups at moment of surgical intervention?	2.3. Answer?	3. Was the allocation adequately concealed?	3. Answer?	4. Were the animals randomly housed during the experiment	4. Answer?	5. Were the caregivers and/or investigators blinded from knowledge which intervention each animal received during the experiment?	5. Answer?	6. Were the animals selected at random for outcome assessment	6. Answer?	7. Was the outcome assessor blinded?	7. Answer?	8. Were incomplete outcome data adequately addressed?	8. Answer?	Remarks for footnote:
Ahn1	2009	?	1.1		?	1.5	?	2.3	-	3.2	?	1.2							-	1.1	-	1.5
Arakaki3	2015	?	1.1		?	1.5	?	2.3	-	3.2	?	1.2							-	1.1	-	1.5
Bal5	2010	?	1.1		?	1.5	?	2.3	-	3.2	?	1.2							-	1.1	?	1.2
Barron6	2015	?	1.3		?	1.5	?	2.3	-	3.2	?	1.2							-	1.1	-	1.5
Betsch8	2013	-	1.4		-	1.6	-	2.4	+	3.1	?	1.2			+				-	1.1	-	1.5	Bone marrow was obtained from 7 pigs.
Betsch9	2014	?	1.3		?	1.5	-	2.4	+	3.1	?	1.2							-	1.1	-	1.5
Caminal10	2015	?	1.3		?	1.5	?	2.3	-	3.2	?	1.2							-	1.1	+	1.1	Well-documented dropout.
Cao11	2012	?	1.1		?	1.5	?	2.3	-	3.2	?	1.2							?	1.2	-	1.5
Chang12	2011	?	1.1		?	1.5	-	2.2	-	3.2	?	1.2							-	1.1	-	1.5
Chang13	2013	?	1.3		?	1.5	-	2.4	-	3.2	?	1.2							-	1.1	-	1.5
Cheng17	2014	?	1.1		?	1.5	?	2.3	-	3.2	?	1.2							?	1.2	+	1.4
Christensen18	2012	?	1.3		?	1.5	-	2.4	-	3.2	?	1.2							-	1.1	+	1.1	Well-documented dropout.
Chung19	2014	?	1.1		?	1.5	?	2.3	-	3.2	?	1.2							?	1.2	-	1.5
Cohen20	2003	?	1.1		?	1.5	?	2.3	-	3.2	?	1.2							-	1.1	-	1.5
Cui22	2009	?	1.1		?	1.5	?	2.3	-	3.2	+	1.1							?	1.2	?	1.2
Dahlin23	2014	?	1.1		?	1.5	-	2.4	-	3.2	?	1.2							-	1.1	-	1.5
de Girolamo24	2015	?	1.1		?	1.5	-	2.4	-	3.2	?	1.2							-	1.1	+	1.4	In only one animal signs of local infection were observed and it was excluded from the study to assure the reliability of the results.
Deng25	2014	?	1.1		?	1.5	?	2.3	-	3.2	?	1.2							?	1.2	-	1.5
Dorotka29	2005	?	1.1		?	1.5	?	2.3	+	3.1	?	1.2			+				-	1.1	+	1.4	Animals in group 4 underwent additional surgery.]
Duan30	2013	?	1.3		?	1.5	?	2.3	-	3.2	?	1.2							-	1.1	-	1.5
Duan31	2013	?	1.1		?	1.5	?	2.3	-	3.2	?	1.2							-	1.1	-	1.5
Endo32	2015	-			-	1.3	-	2.1	-	3.2	?	1.2							?	1.2	-	1.5
Filova33	2007	?	1.1		?	1.5	?	2.3	+	3.1	?	1.2			+				-	1.1	-	1.5	Blinding impossible since animals with the condition 'biomaterial and cells' underwent additional surgery to obtain cells.
Fonseca35	2014	?	1.1		?	1.5	?	2.3	-	3.2	?	1.2							-	1.1	+	1.4
Frenkel37	1997	?	1.1		?	1.5	?	2.3	-	3.2	?	1.2							-	1.1	-	1.5
Frohberg38	2016	?	1.3		?	1.5	-	2.4	-	3.2	?	1.2							-	1.1	-	1.5
Getgood42	2012	?	1.1		?	1.5	?	2.3	-	3.2	?	1.2							-	1.1	+	1.1	Well-documented dropout.
Gong43	2014	-			-	1.3	-	2.1	-	3.2	?	1.2							-	1.1	+	1.4
Guenther44	2014	?	1.1		?	1.5	?	2.3	-	3.2	?	1.2							?	1.2	-	1.5
Guo45	2007	?	1.3		?	1.5	?	2.3	-	3.2	?	1.2							?	1.2	-	1.5
Guo46	2010	?	1.1		?	1.5	?	2.3	-	3.2	?	1.2							-	1.1	-	1.5
Gupta47	2015	?	1.3		?	1.5	-	2.4	-	3.2	?	1.2							?	1.2	-	1.5
Ho51	2010	?	1.1		?	1.5	?	2.3	-	3.2	?	1.2							-	1.1	-	1.5
Igarashi52	2010	?	1.1		?	1.5	?	2.3	-	3.2	?	1.2							-	1.1	-	1.5
Igarashi53	2012	?	1.1		?	1.5	?	2.3	-	3.2	?	1.2							-	1.1	-	1.5
Im54	2010	?	1.1		?	1.5	-	2.4	-	3.2	?	1.2							-	1.1	-	1.5
Im55	2010	?	1.1		?	1.5	?	2.3	-	3.2	?	1.2							-	1.1	-	1.5
Ito56	2008	?	1.3		-	1.3	-	2.1	-	3.2	?	1.2							-	1.1	-	1.5
Ito57	2005	?	1.3		-	1.3	-	2.1	-	3.2	?	1.2							-	1.1	-	1.5
Jagodzinski58	2014	-	1.4		-	1.6	-	2.4	-	3.2	?	1.2							?	1.2	-	1.5
Jang59	2014	?	1.3		?	1.5	?	2.3	-	3.2	?	1.2							?	1.2	-	1.5
Jiang60	2007	?	1.1		?	1.5	?	2.3	-	3.2	?	1.2							-	1.1	-	1.5
Jurgens61	2013	?	1.3		?	1.5	?	2.3	-	3.2	?	1.2							-	1.1	-	1.5
Kang63	2014	?	1.3		?	1.5	?	2.3	-	3.2	?	1.2							?	1.2	-	1.5
Kayakabe64	2006	?	1.3		?	1.5	?	2.3	-	3.2	?	1.2							-	1.1	-	1.5
Kazemnejad65	2016	?	1.3		?	1.5	?	2.3	-	3.2	?	1.2		+					?	1.2	-	1.5	All housed separately.
Kon66	2010	?	1.1		?	1.5	-	2.4	+	3.1	?	1.2			+				?	1.2	-	1.5	Blinding impossible since animals with the condition 'biomaterial and cells' underwent additional surgery to obtain cells.
Köse67	2005	?	1.1		?	1.5	?	2.3	-	3.2	?	1.2							-	1.1	-	1.5
Lee69	2012	?	1.1		?	1.5	-	2.4	-	3.2	?	1.2							-	1.1	+	1.4
Lee70	2013	?	1.1		?	1.5	-	2.4	-	3.2	?	1.2							-	1.1	+	1.4
Lee71	2014	?	1.1		?	1.5	?	2.3	-	3.2	?	1.2							?	1.2	-	1.5
Li72	2008	?	1.3		?	1.5	-	2.4	-	3.2	?	1.2							-	1.1	-	1.5
Li74	2015	?	1.1		?	1.5	?	2.3	-	3.2	?	1.2							-	1.1	-	1.5
Lim75	2013	?	1.3		-	1.3	-	2.1	-	3.2	?	1.2							?	1.2	-	1.5
Liu77	2006	?	1.3		?	1.5	?	2.3	+	3.1	?	1.2			+				?	1.2	-	1.5	Blinding impossible since animals with the condition 'biomaterial and cells' underwent additional surgery to obtain cells.
Liu80	2014	?	1.3		?	1.5	?	2.3	-	3.2	?	1.2							?	1.2	-	1.5
Lohan81	2014	?	1.3		?	1.5	?	2.3	-	3.2	?	1.2							?	1.2	-	1.5
Loken82	2008	?	1.1		-	1.3	-	2.4	-	3.2	?	1.2							-	1.1	-	1.3
Maciulaitis85	2015	?	1.1		?	1.5	-	2.4	-	3.2	?	1.2		+					-	1.1	-	1.5	All housed separately.
Marmotti86	2012	?	1.3		?	1.5	?	2.3	-	3.2	?	1.2							-	1.1	+	1.1
Marmotti87	2013	?	1.3		?	1.5	?	2.3	-	3.2	?	1.2							-	1.1	+	1.1
Masuoka88	2006	?	1.1		?	1.5	-	2.4	-	3.2	?	1.2							?	1.2	-	1.5
Mazaki89	2014	?	1.3		?	1.5	?	2.3	-	3.2	?	1.2							?	1.2	-	1.4	For macroscopic evalaluation one animal is missing, number of samples for histology is correct.
Miller92	2010	?	1.1		?	1.5	-	2.4	-	3.2	?	1.2							-	1.1	+	1.1
Munirah94	2007	?	1.1		?	1.5	-	2.4	-	3.2	?	1.2							?	1.2	-	1.5
Necas95	2010	?	1.1		?	1.5	?	2.3	-	3.2	?	1.2							?	1.2	-	1.5
Niederauer96	2000	+	1.2		?	1.8	?	2.3	+	3.1	?	1.2							-	1.1	+	1.1
Noguchi97	1994	?	1.1		?	1.5	?	2.3	-	3.2	?	1.2							?	1.2	-	1.5
Oliveira98	2010	?	1.1		?	1.5	-	2.4	-	3.2	?	1.2							-	1.1	-	1.5
Pan101	2015	?	1.3		?	1.5	?	2.3	-	3.2	?	1.2							-	1.1	-	1.5
Pei102	2009	?	1.1		?	1.5	-	2.4	-	3.2	?	1.2							-	1.1	-	1.5
Perka103	2000	?	1.1		?	1.5	?	2.3	-	3.2	?	1.2							-	1.1	-	1.5
Perka104	2000	?	1.1		?	1.5	?	2.3	-	3.2	?	1.2							-	1.1	-	1.5
Qi107	2012	?	1.1		?	1.5	?	2.3	-	3.2	?	1.2							-	1.1	-	1.5
Reyes108	2013	?	1.1		?	1.5	-	2.4	-	3.2	?	1.2							?	1.2	-	1.5
Rudert109	2005	?	1.3		?	1.5	-	2.4	-	3.2	?	1.2							-	1.1	?	1.2	No clear evaluation of results: no table or graph, not all data presented.
Schaefer111	2002	?	1.3		?	1.5	-	2.4	-	3.2	?	1.2							-	1.1	+	1.4
Schagemann112	2009	?	1.1		?	1.8	-	2.1	-	3.2	?	1.2							-	1.1	-	1.5
Seo114	2013	?	1.3		-	1.2	-	2.1	-	3.2	-	1.3							?	1.2	-	1.5
Shao116	2006	?	1.3		?	1.5	?	2.3	-	3.2	?	1.2							-	1.1	+	1.4
Shimomura118	2014	?	1.1		?	1.5	?	2.3	-	3.2	?	1.2							?	1.2	-	1.5
Solchaga119	2002	?	1.1		?	1.5	?	2.3	-	3.2	?	1.2							-	1.1	-	1.5
Sosio121	2015	?	1.1		?	1.8	-	2.1	-	3.2	?	1.2							-	1.1	-	1.5
Tan122	2011	?	1.3		?	1.5	?	2.3	-	3.2	?	1.2							?	1.2	-	1.5
Tatebe124	2005	?	1.1		?	1.5	?	2.3	-	3.2	?	1.2							?	1.2	-	1.5
Veronesi125	2015	?	1.1		?	1.5	-	2.4	-	3.2	?	1.2							?	1.2	-	1.5
Wakitani126	1994	?	1.1		?	1.5	?	2.3	-	3.2	?	1.2							?	1.2	-	1.5
Wang129	2010	?	1.3		?	1.5	?	2.3	-	3.2	?	1.2							-	1.1	-	1.5
Wang130	2014	?	1.3		?	1.5	?	2.3	-	3.2	?	1.2							?	1.2	-	1.5
Wang132	2016	?	1.1		?	1.5	?	2.3	-	3.2	?	1.2		+					?	1.2	-	1.3	All housed separately.
Wayne133	2005	?	1.1		-	1.3	-	2.1	-	3.2	?	1.2							?	1.2	-	1.5
Wegener134	2010	?	1.1		?	1.5	?	2.3	-	3.2	?	1.2							-	1.1	-	1.5
Xie136	2010	?	1.1		?	1.5	?	2.3	-	3.2	?	1.2							-	1.1	+	1.4	Uncertain how samples were divided between different analyses and whether samples may be missing.
Xie137	2012	?	1.1		?	1.5	?	2.3	-	3.2	?	1.2							-	1.1	-	1.5
Yan138	2007	?	1.3		?	1.5	?	2.3	-	3.2	?	1.2							?	1.2	+	1.1	Well-documented dropout.
Yang140	2011	?	1.3		-	1.3	-	2.1	-	3.2	?	1.2							-	1.1	-	1.5
Yin142	2016	?	1.3		?	1.5	?	2.3	-	3.2	?	1.2							-	1.1	-	1.5
Zhao143	2013	?	1.1		?	1.5	?	2.3	-	3.2	?	1.2							-	1.1	-	1.5
Zhao144	2015	?	1.3		?	1.5	?	2.3	-	3.2	?	1.2							?	1.2	+	1.4	Samples are missing; analysis only contains n = 3 per sample, while n = 6 were implanted.
Zhou145	2008	?	1.1		?	1.5	?	2.3	-	3.2	?	1.2							-	1.1	-	1.5
Zhu146	2016	?	1.3		?	1.5	?	2.3	-	3.2	?	1.2							?	1.2	+	1.4	Two deaths occurred during the experiment, which were supplemented with new rabbits.
