# Supplementary material for: Augmented cartilage regeneration by implantation of cellular versus acellular implants after bone marrow stimulation: a systematic review and meta-analysis of animal studies
Source: PeerJ journal article supplement (doi:10.7717/peerj.3927), 2017-10-27
Supplement: Supplementary_Information_2_-_Screening_criteria.pdf [file Supplementary_Information_2_-_Screening_criteria.pdf]

## Supplementary Information 2. Exclusion criteria.

### Title screening

1. No primary study
2. No animal study
3. No bone marrow stimulation performed
4. Osteoarthritis models
5. Ex vivo studies
6. Deceased animals

### Title/abstract screening

1. No primary study
2. No animal study
3. No bone marrow stimulation performed
4. Osteoarthritis models
5. Ex vivo studies
6. Deceased animals

### Full-text screening

1. No primary study
2. No animal study
3. No 'healthy' animals (*i.e.* arthritis models)
4. No cartilage (*i.e.* bone or other tissue)
5. No articular cartilage (*i.e.* elastic cartilage)
6. Not in the knee or ankle joint (*i.e.* ear, rib)
7. No bone marrow stimulation performed
8. No scaffold implanted
9. No cell-free scaffold implanted
10. No cell-laden scaffold implanted
