# Supplementary material for: Augmented cartilage regeneration by implantation of cellular versus acellular implants after bone marrow stimulation: a systematic review and meta-analysis of animal studies
Source: PeerJ journal article supplement (doi:10.7717/peerj.3927), 2017-10-27

## Supplementary Information 7. The forest plot illustrates the difference in cartilage regeneration between cellular and acellular biomaterials of each individual study.

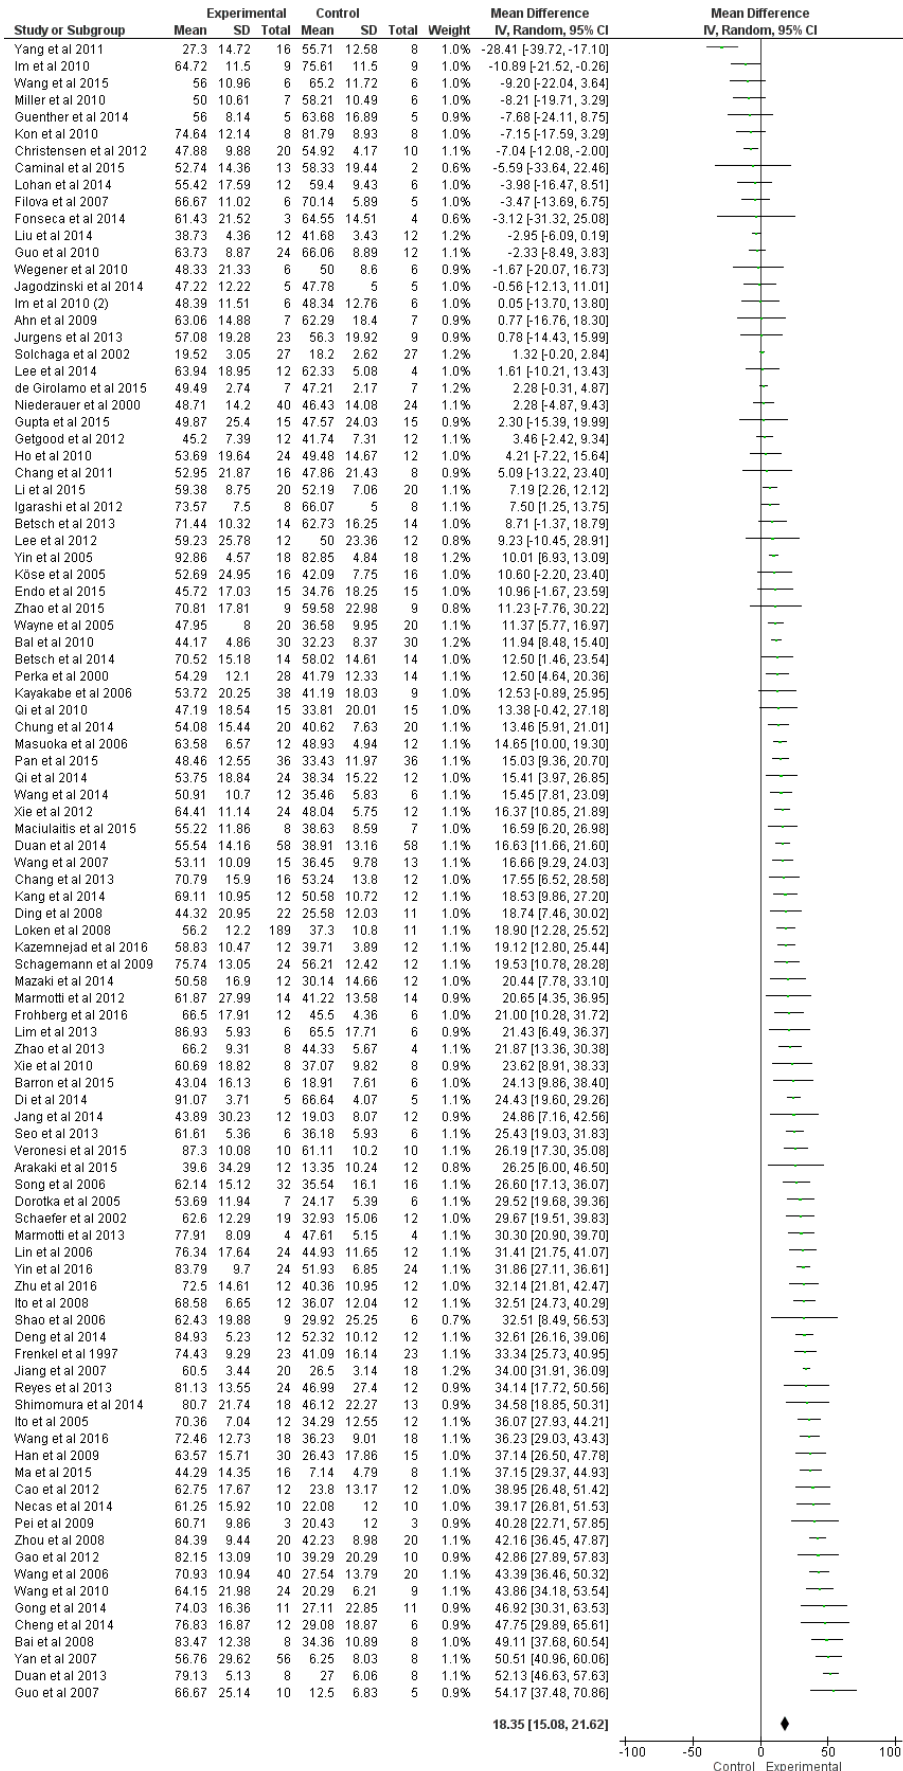

Supplement: Supplementary_Information_7_-_Forest_plot.pdf [file Supplementary_Information_7_-_Forest_plot.pdf]
